# Supplementary material for: Modular assembly of the principal microtubule nucleator γ-TuRC
Source: PubMed Central journal article supplement (PMC8789826; doi:10.1038/s41467-022-28079-0), 2022-01-25

## Supplementary Information

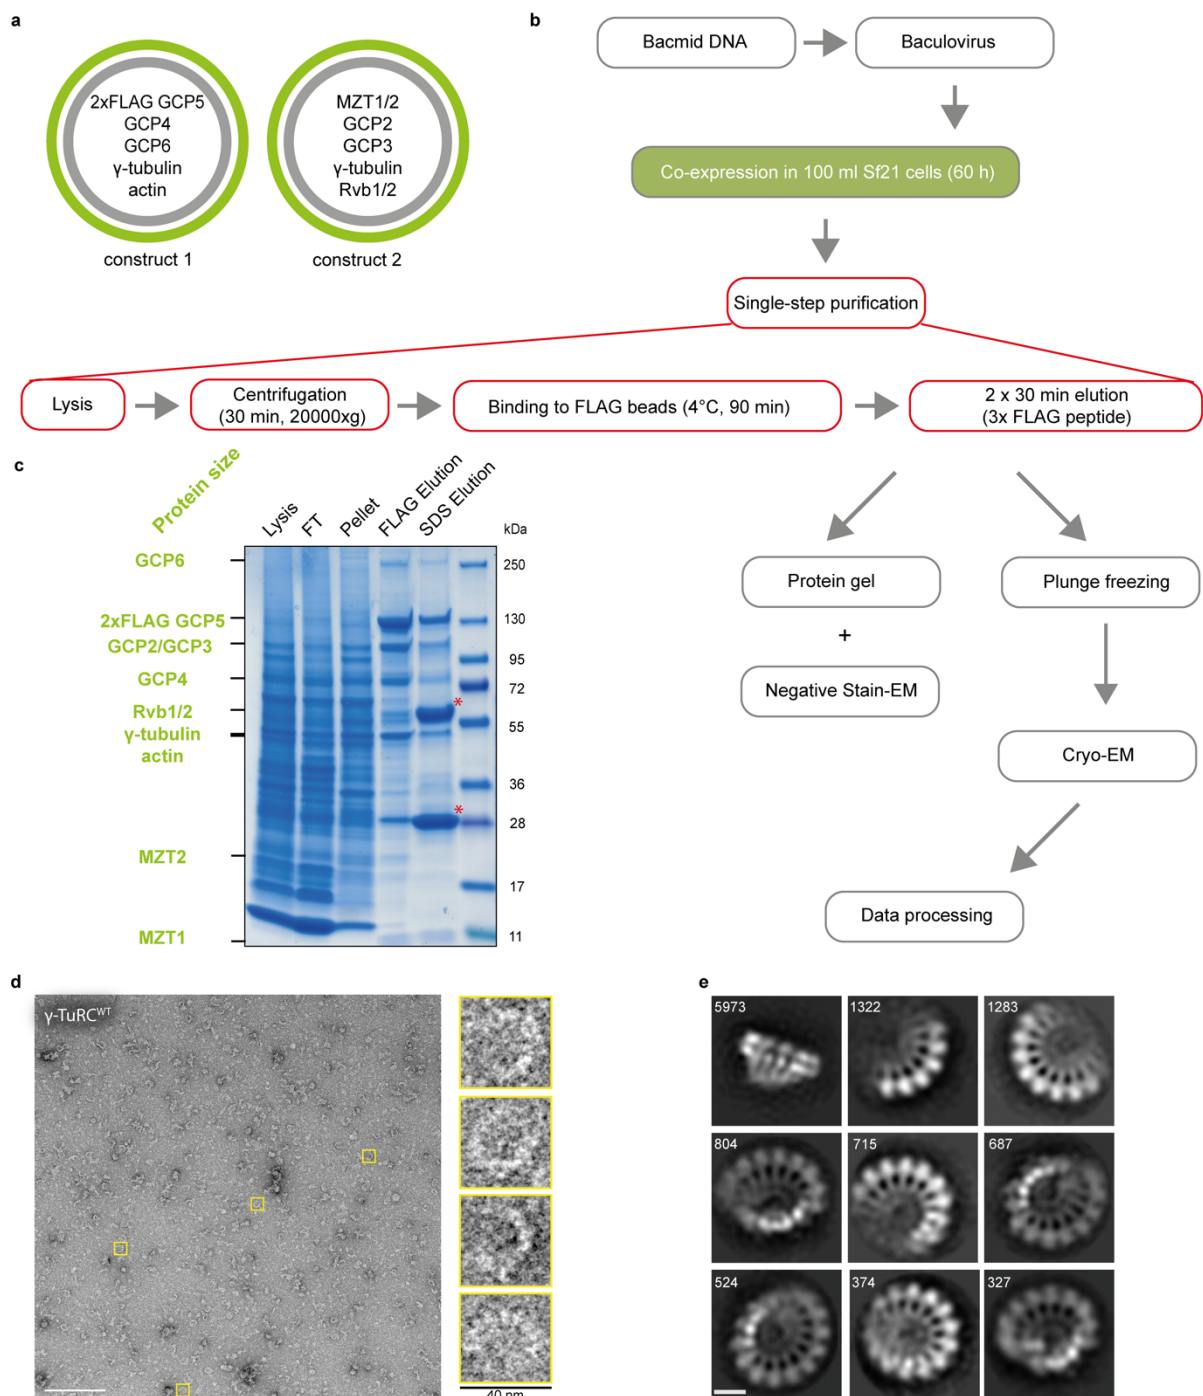

**Supplementary Fig. 1: Purification and initial characterization of recombinant human  $\gamma$ -TuRC.** **a** Cloned MultiBac constructs (construct 1 and 2) with the genes of human  $\gamma$ -TuRC (see methods). **b** Experimental pipeline of the recombinant  $\gamma$ -TuRC experiments. Baculoviruses of each construct were used to co-express all eleven genes in Sf21 insect cells. Cell pellets from 100 ml cells (green box) were used for single step FLAG purification against 2xFLAG GCP5 (red boxes). Flag elutions were screened via SDS-PAGE (**c**) and negative stain EM (**d,e**), and used for plunge freezing and subsequent cryo-EM analysis. **c** Coomassie-stained SDS-PAGE of the  $\gamma$ -TuRC purification sample used for cryo-EM showing the cell lysate (lysis), cell pellet (pellet), flow through (FT), and several proteins co-purified with 2xFLAG GCP5 in the FLAG elution. Expected protein sizes are indicated (green). FLAG beads were boiled with SDS loading buffer after FLAG peptide elution; red asterisks indicate heavy and light chain of FLAG antibodies. **d** Representative negative stain EM micrograph of the FLAG elution shown in (**c**), scale bar 250

nm, individual particles are highlighted in yellow boxes (40 nm). **e** Representative negative stain EM 2D class averages from the  $\gamma$ -TuRC sample used for cryo-EM analysis. Particle numbers are given in the left upper corner of the images. Scale bar: 10 nm. Data shown in **c-e** are from one experiment with no repetition of SDS-page and negative stain EM imaging. Purifications were repeated more than n=3 times.

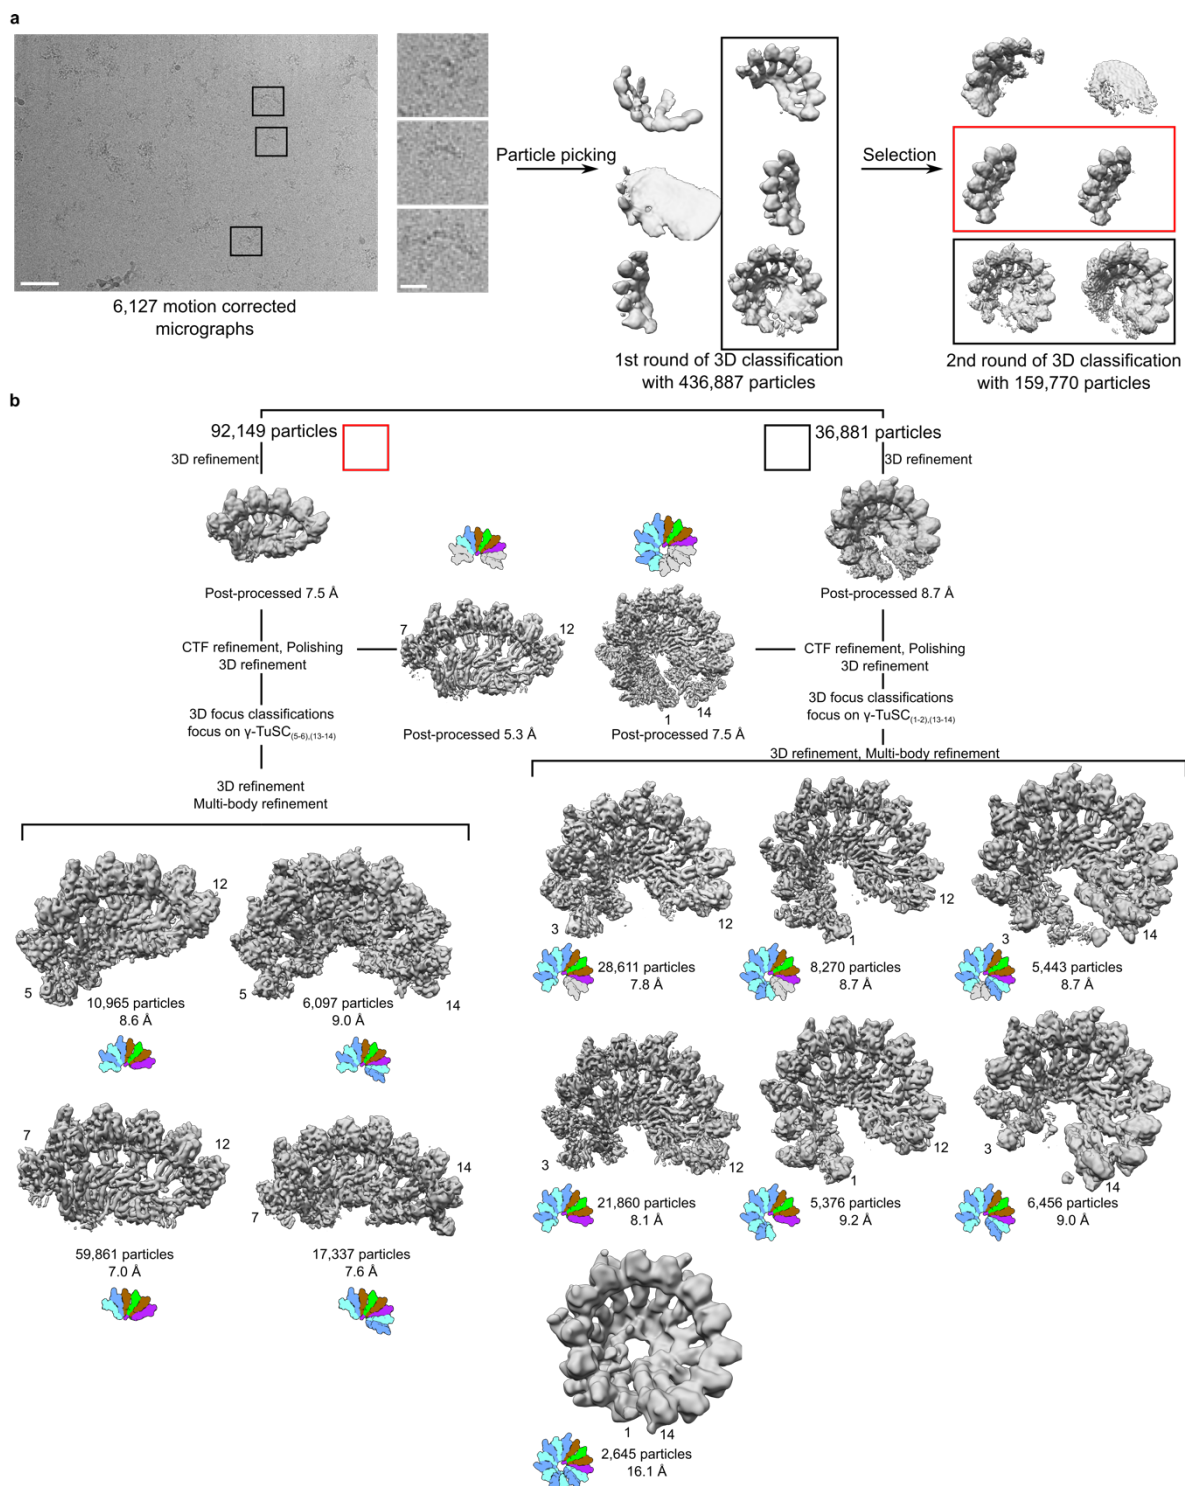

**Supplementary Fig. 2: Processing scheme for the recombinant human  $\gamma$ -TuRC.** **a** Zoom on a representative micrograph and three representative particles. Scale bars correspond to 80 nm (micrograph) and 20 nm (particles), respectively. Two initial rounds of 3D classification separated false positive particles from large and small  $\gamma$ -TuRC assemblies. Number of input particles for both classification rounds is indicated. Classes highlighted in red and black contain the sets of particles further processed in the left and right branch of the processing scheme in **(b)**, respectively. **b** Processing of selected particles from **(a)** in two separate branches. Number of particles and resolution for each 3D reconstruction is indicated. The first and the last spokes visible in the reconstructions are numbered. Initially, particles in both branches were subjected to CTF refinement, Bayesian polishing and 3D autorefinement. Several consecutive rounds of focused 3D classification led to subsets of the particles corresponding to the different assembly states. For each reconstruction, the small icon indicates the set of particles

used during 3D refinement. Stoichiometric spokes are colored as in Fig. 1a. Substoichiometric spokes are depicted in grey. Spokes not shown in the icon are completely absent in the reconstruction. Data shown in **a** are from one acquisition with no repetition. Source data are provided as a Source Data file.

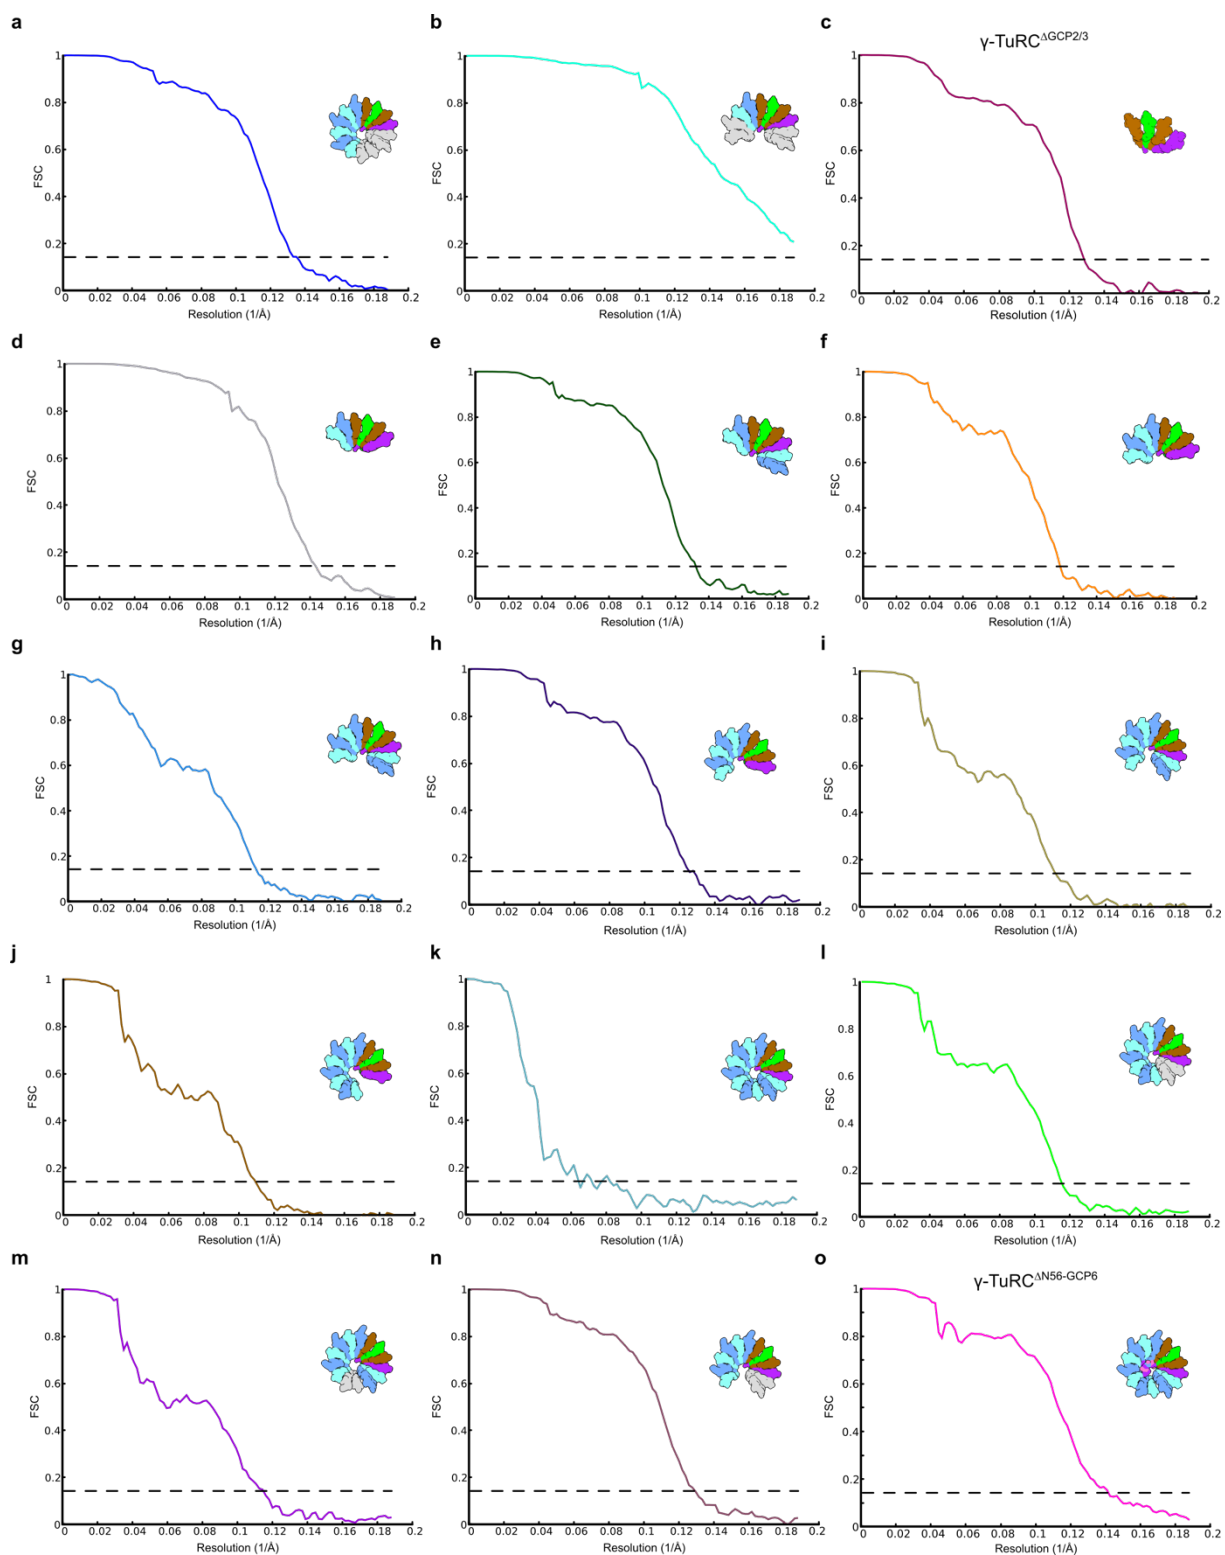

**Supplementary Fig. 3: Fourier shell correlation (FSC) plots of all cryo-EM reconstructions described in the manuscript.** **a** FSC curve for recombinant wild-type  $\gamma$ -TuRC (spokes 1-14). **b** FSC curve recombinant wild-type  $\gamma$ -TuRC, 6-spoked assembly intermediate (spokes 7-12). **c** FSC curve for recombinant  $\gamma$ -TuRC <sup>$\Delta$ GCP2/3</sup>. **d** FSC curve for recombinant wild-type  $\gamma$ -TuRC, 6-spoked assembly intermediate (spokes 7-12, homogeneous dataset). **e** FSC curve for recombinant wild-type  $\gamma$ -TuRC, 8-spoked assembly intermediate (spokes 7-14). **f** FSC curve for recombinant wild-type  $\gamma$ -TuRC, 8-spoked assembly intermediate (spokes 5-12). **g** FSC curve for recombinant wild-type  $\gamma$ -TuRC, 10-spoked assembly intermediate (spokes 5-14). **h** FSC curve for recombinant wild-type  $\gamma$ -TuRC, 10-

spoked assembly intermediate (spokes 3-12, homogeneous dataset). **i** FSC curve for recombinant wild-type  $\gamma$ -TuRC, 12-spoked assembly intermediate (spokes 3-14, homogeneous dataset). **j** FSC curve for recombinant wild-type  $\gamma$ -TuRC, 12-spoked assembly intermediate (spokes 1-12, homogeneous dataset). **k** FSC curve for recombinant wild-type  $\gamma$ -TuRC (spokes 1-14, homogeneous dataset). **l** FSC curve for recombinant wild-type  $\gamma$ -TuRC, 12-spoked assembly intermediate (spokes 1-12 substoichiometric spokes 13-14). **m** FSC curve for recombinant wild-type  $\gamma$ -TuRC, 12-spoked assembly intermediate (spokes 3-14 substoichiometric spokes 1-2). **n** FSC curve for recombinant wild-type  $\gamma$ -TuRC, 10-spoked assembly intermediate (spokes 3-12, substoichiometric spokes 13-14). **o** FSC curve for recombinant  $\gamma$ -TuRC<sup>AN56-GCP6</sup>. For recombinant wild-type  $\gamma$ -TuRC, the set of particles used for each reconstruction is also indicated by icons as in Supplementary Fig. 2. The FSC gold standard threshold of 0.143 is indicated by a dashed line in all plots. All plots were prepared in Gnuplot v5.2<sup>1</sup>. Source data are provided as a Source Data file.

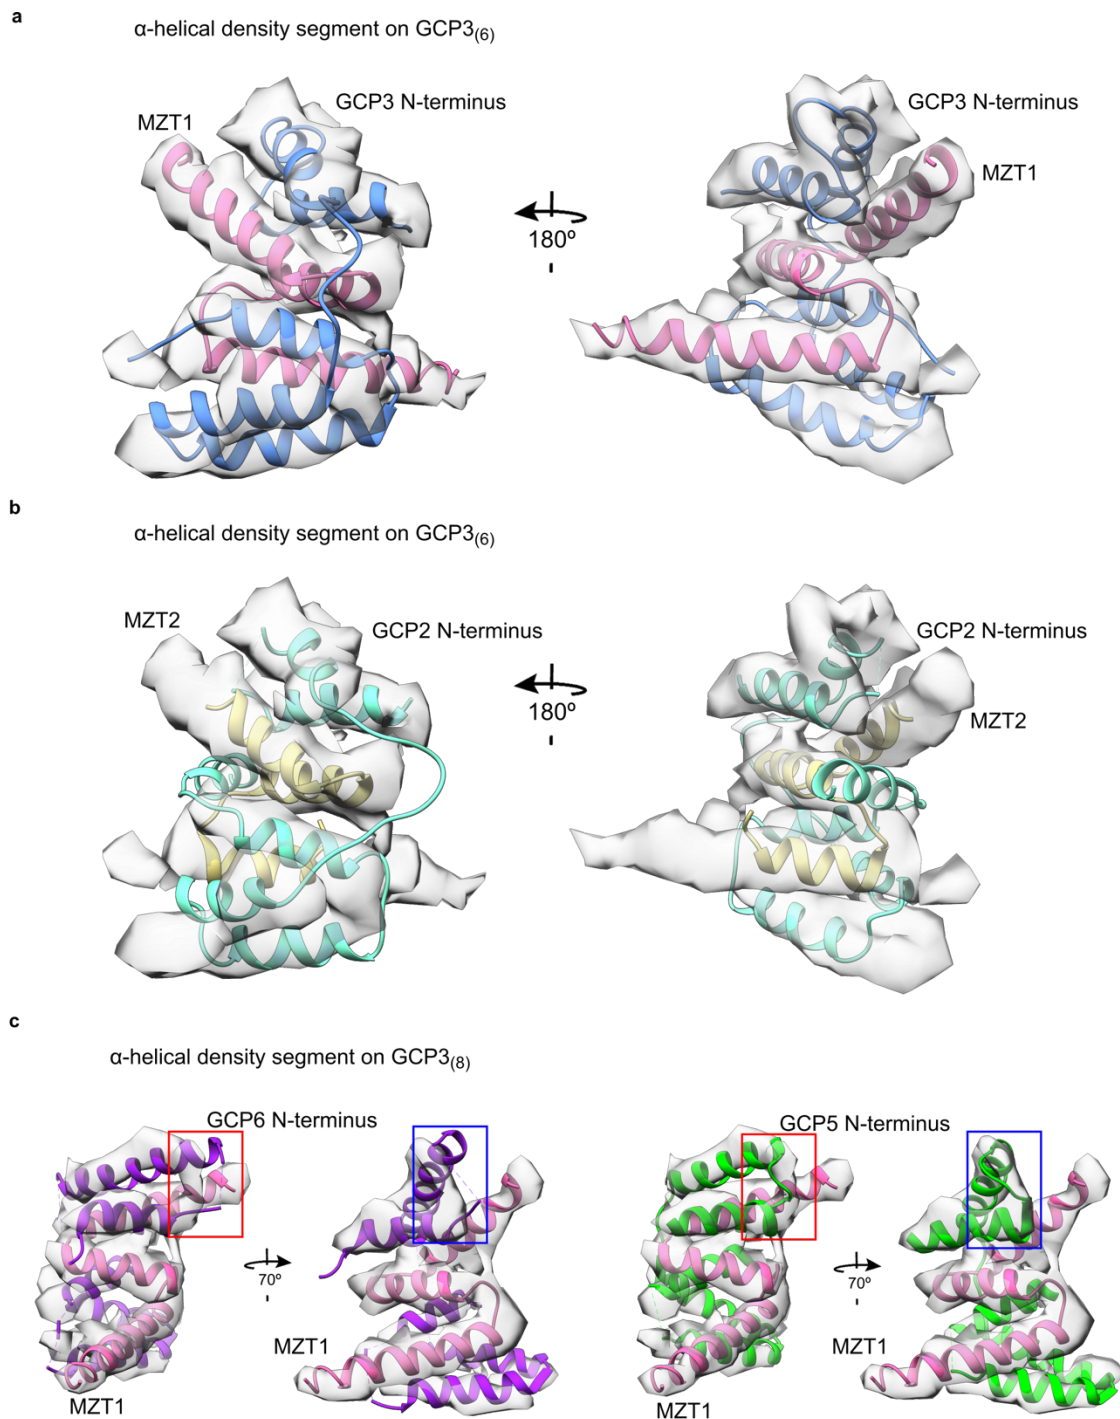

**Supplementary Fig. 4: The  $\alpha$ -helical density segments on the outer surface of the  $\gamma$ -TuRC represent MZT1-GCP modules.** **a** Rigid body fit of the MZT1 (pink) - GCP3 (blue) module (PDB 6X0U) into the  $\alpha$ -helical density segment associated with GCP3<sub>(6)</sub> of the  $\gamma$ -TuRC reconstruction. The model excellently explains the density segment. The GCP3<sub>(6)</sub> density segment is representative for the density segments on GCP3<sub>(2)</sub>, GCP3<sub>(4)</sub> and GCP3<sub>(14)</sub>. **b** Rigid body fit of the MZT2 (khaki) - GCP2 (cyan) module (PDB 6X0V) into the same density segment. Based on the length and number of resolved  $\alpha$ -helices, we can exclude that the density segments correspond to MZT2-GCP modules. **c** Rigid body fit of MZT1 (pink) in complex with the GCP6 N-terminus (purple) (PDB 6M33) or the GCP5 N-terminus (green) (PDB 6L81) into the  $\alpha$ -helical density segment associated with GCP3<sub>(8)</sub> of the 6-spoke intermediate. Red and blue boxes highlight density segments important for identification of the GCP variant.

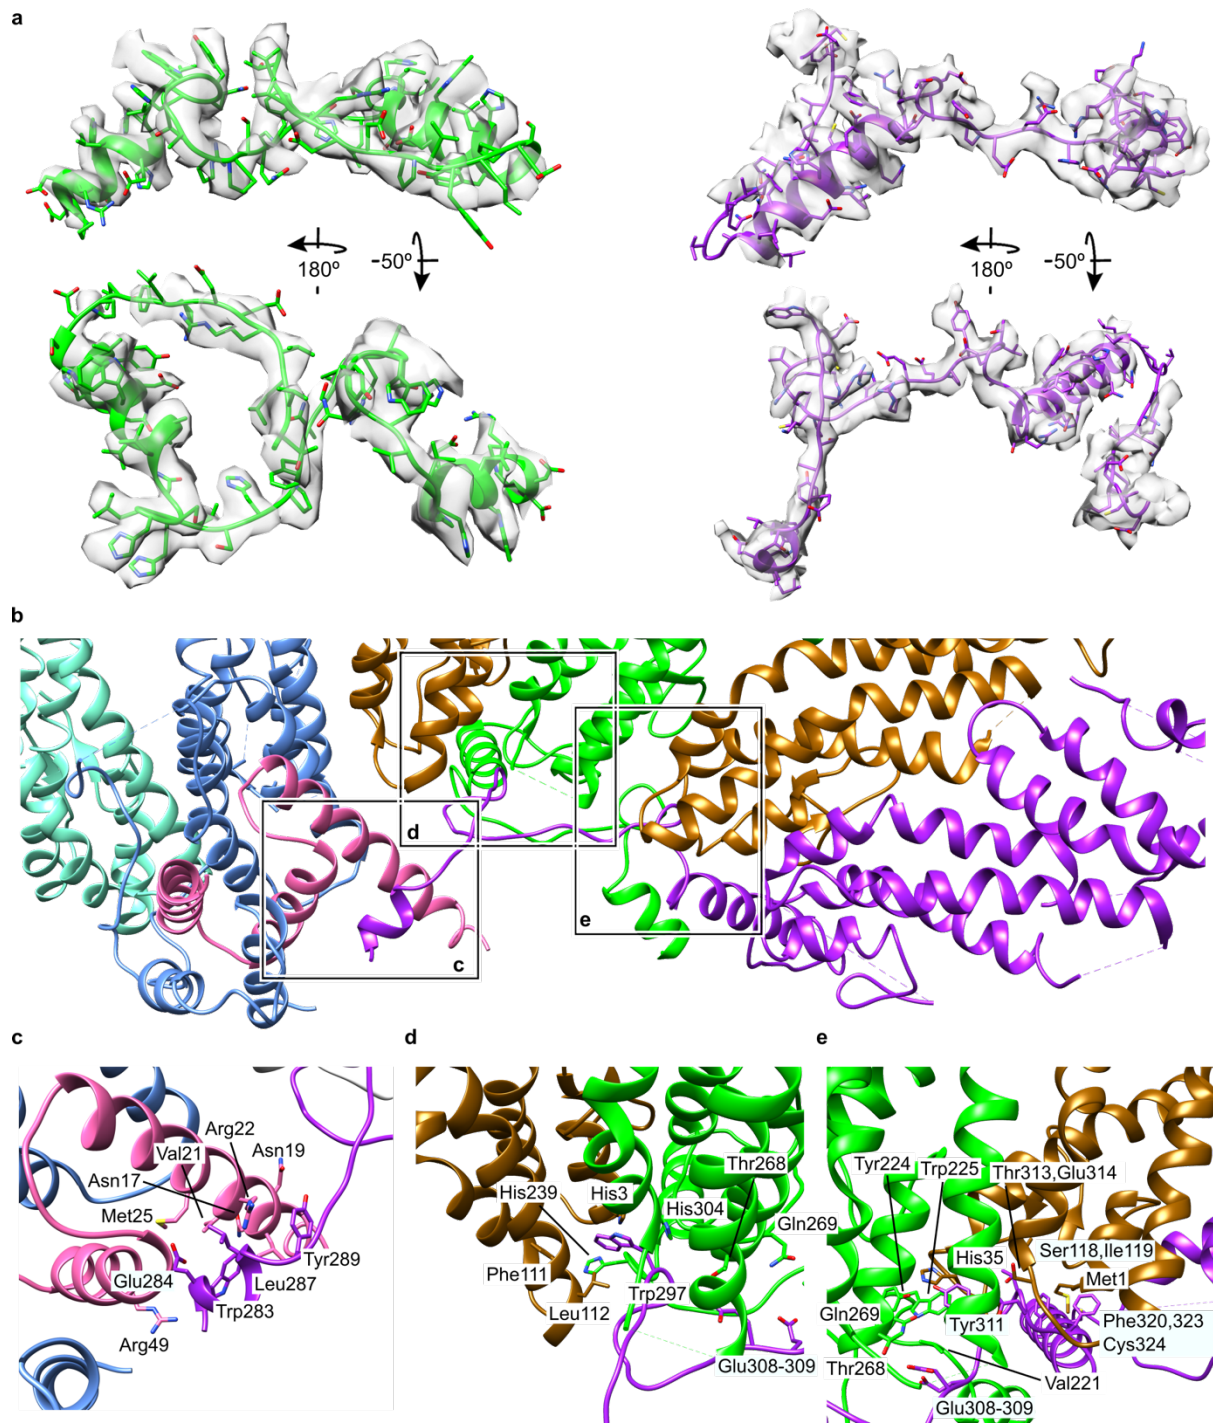

**Supplementary Fig. 5: The GCP6 GRIP1-NTE stabilizes the 6-spoke intermediate.** **a** N-terminal segments of GCP5 (210-266) and GCP6 (282-351) were newly built into published cryo-EM reconstructions (EMD-21074, EMD-21069)<sup>2</sup>. Atomic models superposed to the respective density segments. **b** Atomic model for the 6-spoke intermediate including the newly built segments of GCP5 and GCP6. Zoom on the GRIP1 domains and N-terminal extensions. Coloring as in Fig. 1a. Boxes indicate the position of zoomed views in panels (**c-e**). **c-e** Zoom on the interaction areas between the GCP6 GRIP1-NTE and MZT1 (**c**), GCP4<sub>(9)</sub> and GCP5<sub>(10)</sub> (**d**) and GCP5<sub>(10)</sub> and GCP4<sub>(11)</sub> (**e**) Side chains of residues involved in interactions are shown and labelled.



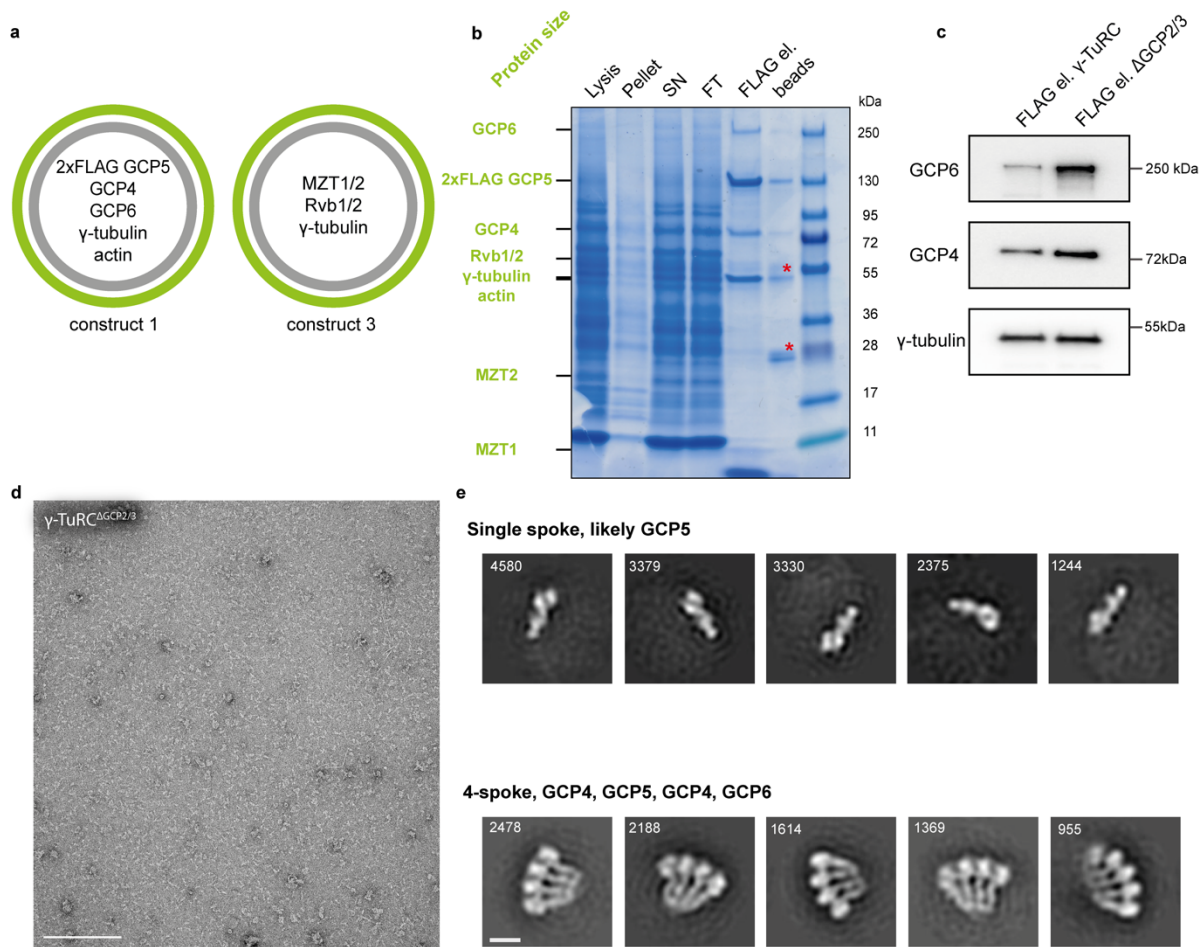

**Supplementary Fig. 6: GCP4-6 can form a 4-spoke assembly when GCP2 and GCP3 are omitted from the expression system.** **a** Cloned MultiBac constructs (construct 1 and construct 3) with the genes of human  $\gamma$ -TuRC components, omitting GCP2/3 co-expression ( $\gamma$ -TuRC $^{\Delta$ GCP2/3}, see methods). Protein expression and purification was performed as described for wild-type  $\gamma$ -TuRC samples (Supplementary Fig. 1b). **b** Coomassie stained SDS-PAGE of complex purification showing the cell lysis (lysis), cell pellet (pellet), supernatant (SN), flowthrough (FT), and proteins copurified with 2xFLAG GCP5 in the FLAG elution. Expected protein sizes are indicated (green). FLAG beads were boiled with SDS loading buffer after FLAG peptide elution, red stars indicate heavy and light chain of FLAG antibodies. **c** Sections of immunoblot analysis of FLAG elutions (FLAG el.) from wild-type  $\gamma$ -TuRC (Supplementary Fig. 1) and  $\Delta$ GCP2/3, against GCP6, GCP4 and  $\gamma$ -tubulin antibodies. **d** Representative negative stain EM micrograph of the FLAG elution in (b), scale bar 250 nm. **e** Representative negative stain EM 2D class averages. 2D classification resulted in two major particle populations: single spokes (likely 2xFLAG-GCP5), and 4-spoked subcomplexes corresponding to GCP4-5-4-6. Particle numbers are given in the left upper corner of the images. Scale bar: 10 nm. Data shown in b-e are from one experiment with no repetition of SDS-page and negative stain EM imaging and one repetition of immunoblot analysis. Protein complex expression and purification were repeated n=3 times.

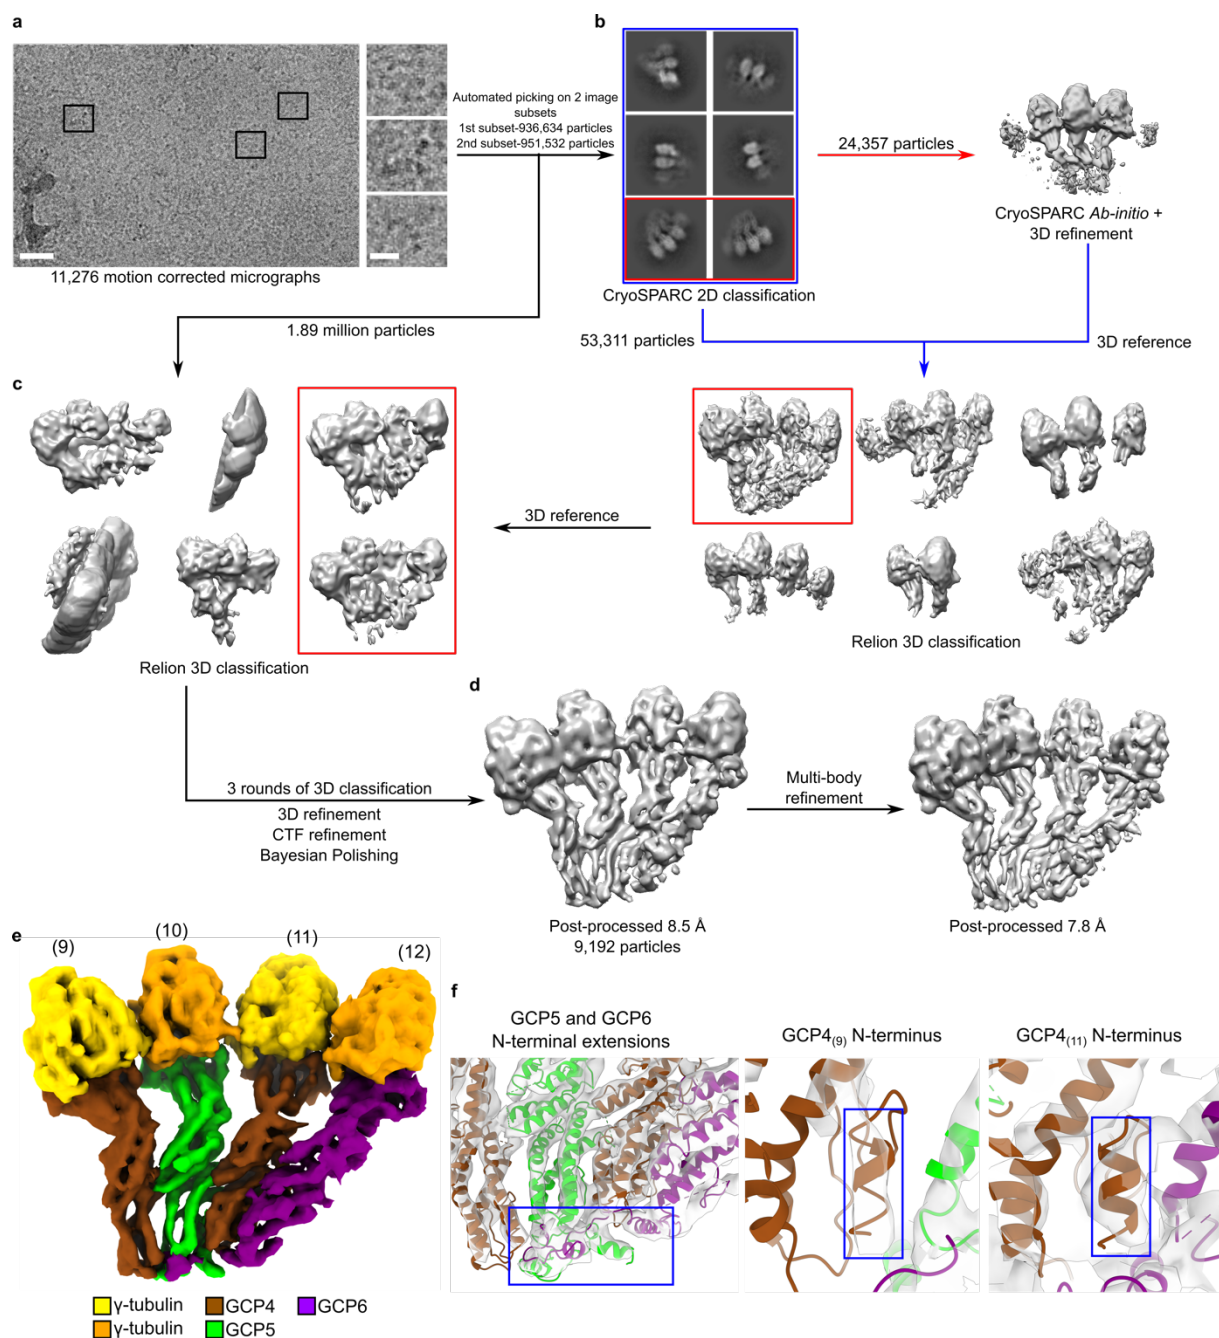

**Supplementary Fig. 7: Cryo-EM data processing and density analysis of recombinant human  $\gamma$ -TuRC $\Delta$ GCP2/3.**

**a** Zoom on a representative micrograph and three representative particles. Scale bars correspond to 30 nm (micrograph) and 10 nm (particles), respectively. **b** Auto-picked particles were subjected to 2D classification in CryoSPARC. Six representative classes are shown. The highlighted 2D classes (red box) were used for *ab-initio* reconstruction and homogeneous refinement in CryoSPARC to generate an initial 3D reference. The density from (a) was used for 3D classification of an extended set of particles (blue box) in Relion to generate a more refined 3D reference, highlighted in red among the resultant 3D classes. **c** All picked particles were divided into subsets and subjected to several tiers of 3D classification using the reference from (b). 3D Classes after the 1<sup>st</sup> round of 3D classification are shown and selected 3D classes are highlighted. Three additional rounds of 3D classification resulted in the final set of particles, which were subjected to 3D refinement, CTF refinement and Bayesian particle polishing. **d** The final polished set of particles was subjected to 3D refinement (left) and multi-body refinement (right). **e** Cryo-EM density of the 4-spoke intermediate after multi-body refinement at 7.8 Å resolution. Colouring as indicated. Spoke numbering according to fully assembled  $\gamma$ -TuRC. **f** Zoom on density segments and atomic models

of the GCP N-termini in the 4-spoke intermediate. Left, N-terminal extension of GCP5 (green model) and GCP6 (purple model). Right, Last N-terminal helix in GCP4<sub>(9)</sub> and GCP4<sub>(11)</sub> (brown model). N-termini are highlighted in blue boxes. Data shown in **a** are from one acquisition with no repetition.

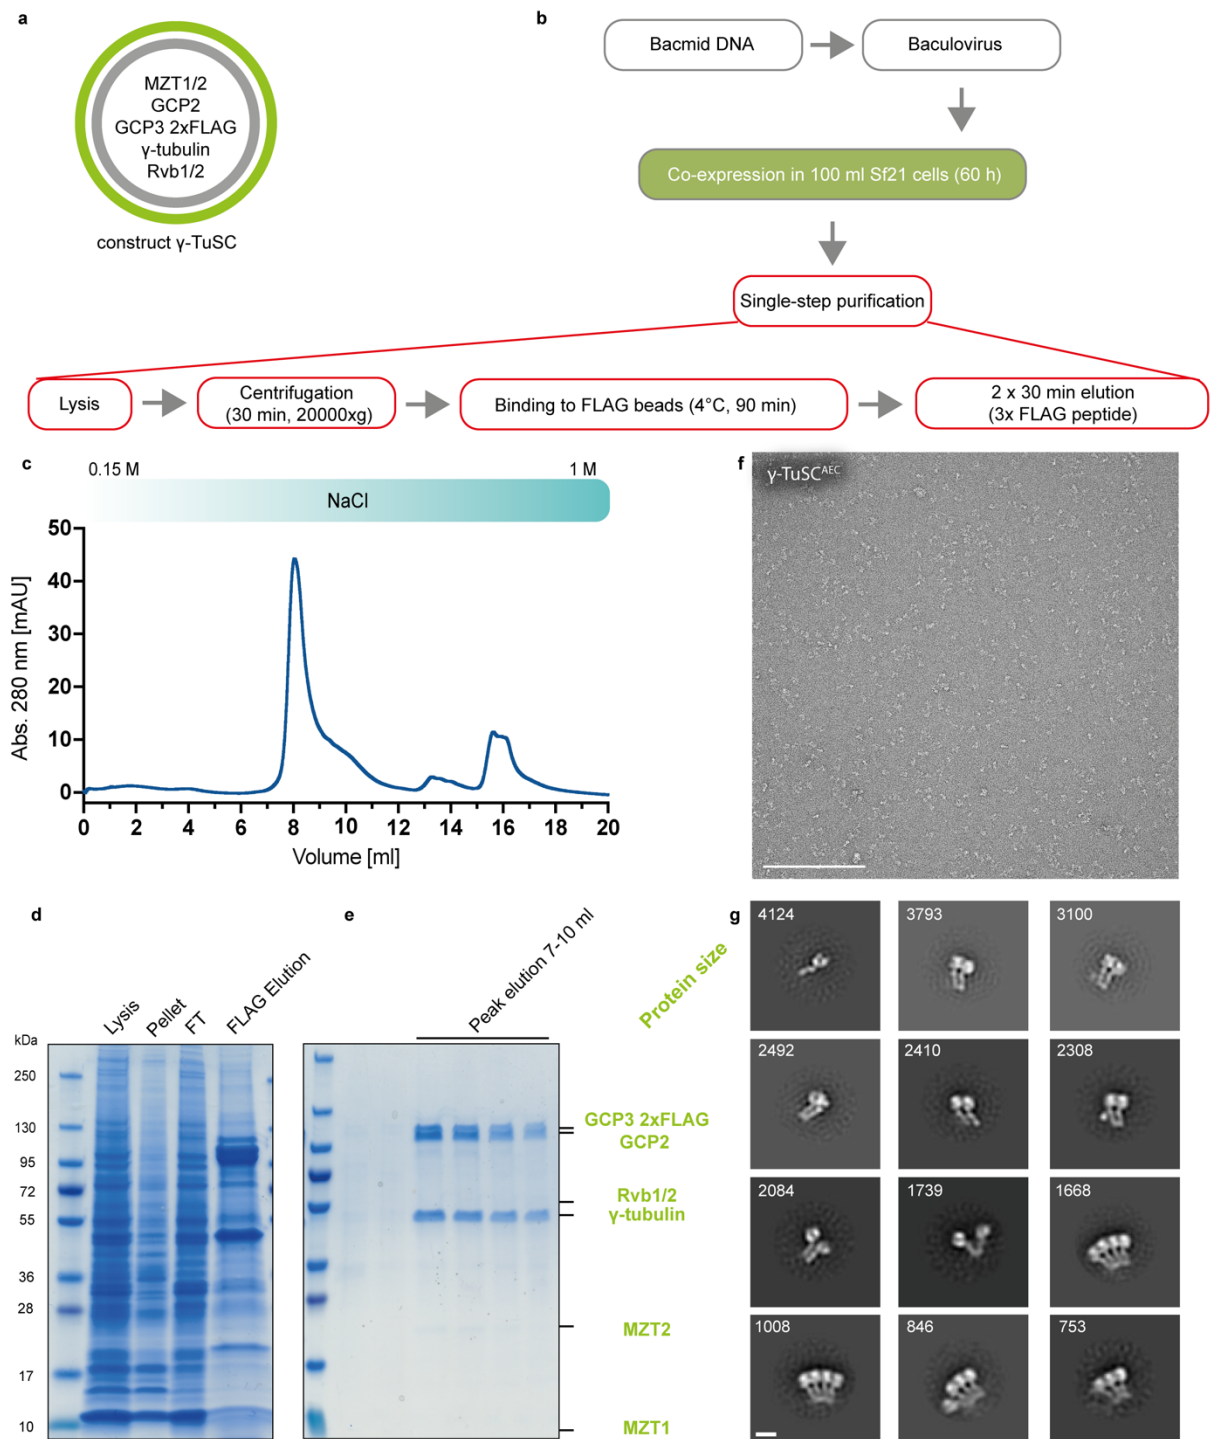

**Supplementary Fig. 8: Recombinant expression and purification of human  $\gamma$ -TuSC.** **A** Cloned MultiBac construct (construct  $\gamma$ -TuSC) with the genes of human  $\gamma$ -TuSC and the RUVBL1-RUVBL2 ATPase (Rvb1/2, see methods). **B** Experimental pipeline of the recombinant  $\gamma$ -TuSC purification. Baculoviruses of the construct were used to co-express the 7 genes in Sf21 insect cells. Cell pellets from 100 ml cells (green box) were used for single step FLAG purification against GCP3-2xFLAG (red boxes). FLAG elution was further purified via anion exchange chromatography (AEC) using a MonoQ (5/50 GL, Cytiva) column. **C** Chromatogram of AEC purification of recombinant  $\gamma$ -TuSC. **D,E** Coomassie stained SDS-PAGE of  $\gamma$ -TuSC purifications showing the cell lysate (lysis), cell pellet (Pellet), flowthrough (FT), and several proteins co-purified with GCP3 2xFLAG in the FLAG elution (**d**), and peak fraction of AEC run (**e**). Expected protein sizes are indicated (green). **F** Representative negative stain EM micrograph of  $\gamma$ -TuSC after AEC, scale bar 250 nm. **G** Representative negative stain EM 2D class averages. Particle

numbers are given in the left upper corner of the images. Scale bar: 10 nm. Data shown in **c-g** are from one experiment with no repetition of SDS-page and negative stain EM imaging. Protein complex expression and purification were repeated n=3 times. Source data are provided as a Source Data file.

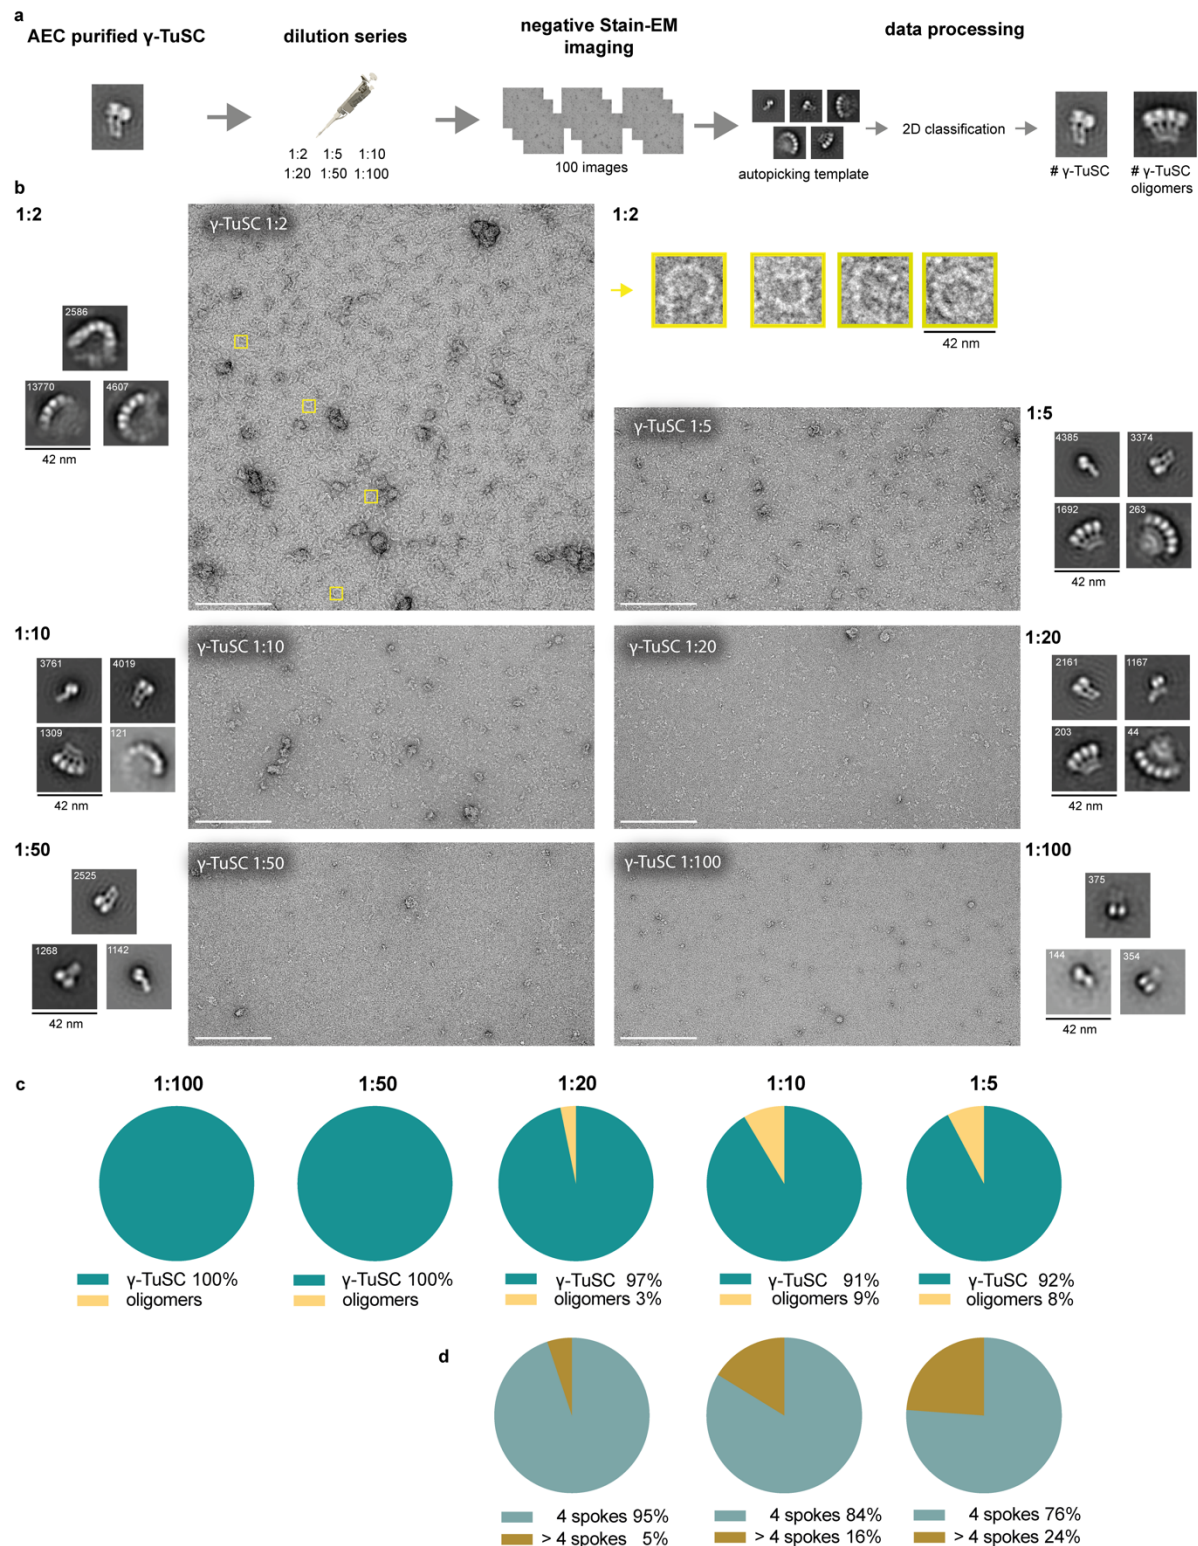

**Supplementary Fig. 9:  $\gamma$ -TuSC oligomerization is concentration-dependent.** **a** Experimental scheme of the  $\gamma$ -TuSC dilution series. AEC-purified recombinant  $\gamma$ -TuSC was concentrated to 3.6  $\mu$ M (Amicon 30k), diluted (schematic pipette) and directly used for negative stain-EM imaging. 100 negative-stain EM images were processed in the same way for each dilution (see methods). Particles corresponding to single  $\gamma$ -TuSC units and  $\gamma$ -TuSC oligomers in the resulting 2D class averages were quantified. **b** For each dilution, a section of a representative negative stain EM micrograph is shown (scale bars 250 nm), together with representative 2D class averages of single  $\gamma$ -TuSC units or  $\gamma$ -TuSC oligomers (box sizes 42 nm). For the 1:2 dilution, zoomed individual particles are

highlighted (yellow boxes, 42 nm) additionally. Particle numbers contributing to the respective classes are given. The negative stain EM data are from one experiment, no repetition. **c,d** relative abundance of single  $\gamma$ -TuSC (green) units vs.  $\gamma$ -TuSC oligomers (yellow) (**c**), and of 4-spoked (turquoise) vs. even larger  $\gamma$ -TuSC oligomers (brown) (**d**). 1:100,  $\gamma$ -TuSC (n=873). 1:50,  $\gamma$ -TuSC (n=11,296). 1:20,  $\gamma$ -TuSC (n=25,685), oligomers (n=856). 1:10,  $\gamma$ -TuSC (n=30,008), oligomers (n=2,815). 1:5,  $\gamma$ -TuSC (n=42,055), oligomers (n=3,513). At low  $\gamma$ -TuSC concentration (30 nM - 60 nM, corresponding to dilution of 1:100 - 1:50), we observed exclusively individual  $\gamma$ -TuSC units, indicating that no oligomerization occurred. For medium  $\gamma$ -TuSC concentration (200 nM - 700 nM, corresponding to dilution of 1:5 - 1:20),  $\gamma$ -TuSC oligomers start to occur at a ratio of up to ~10% of  $\gamma$ -TuSC particles. **d** 1:20, 4 spokes (n=812), > 4 spokes (n=44). 1:10, 4 spokes (n=2,358), > 4 spokes (n=457). 1:5, 4 spokes (n=2,675), > 4 spokes (n=838). The maximum size of  $\gamma$ -TuSC oligomers increases from  $\gamma$ -TuSC dimers (4 spokes) up to  $\gamma$ -TuSC tetramers (8 spokes). At very high concentration of  $\gamma$ -TuSC units (1.6  $\mu$ M, corresponding to dilution of 1:2), particle density was too high for comprehensive particle localization and 2D class averaging, but inspection of the micrographs suggested that a large fraction of  $\gamma$ -TuSC units was present in the context of very large oligomers. Source data are provided as a Source Data file.

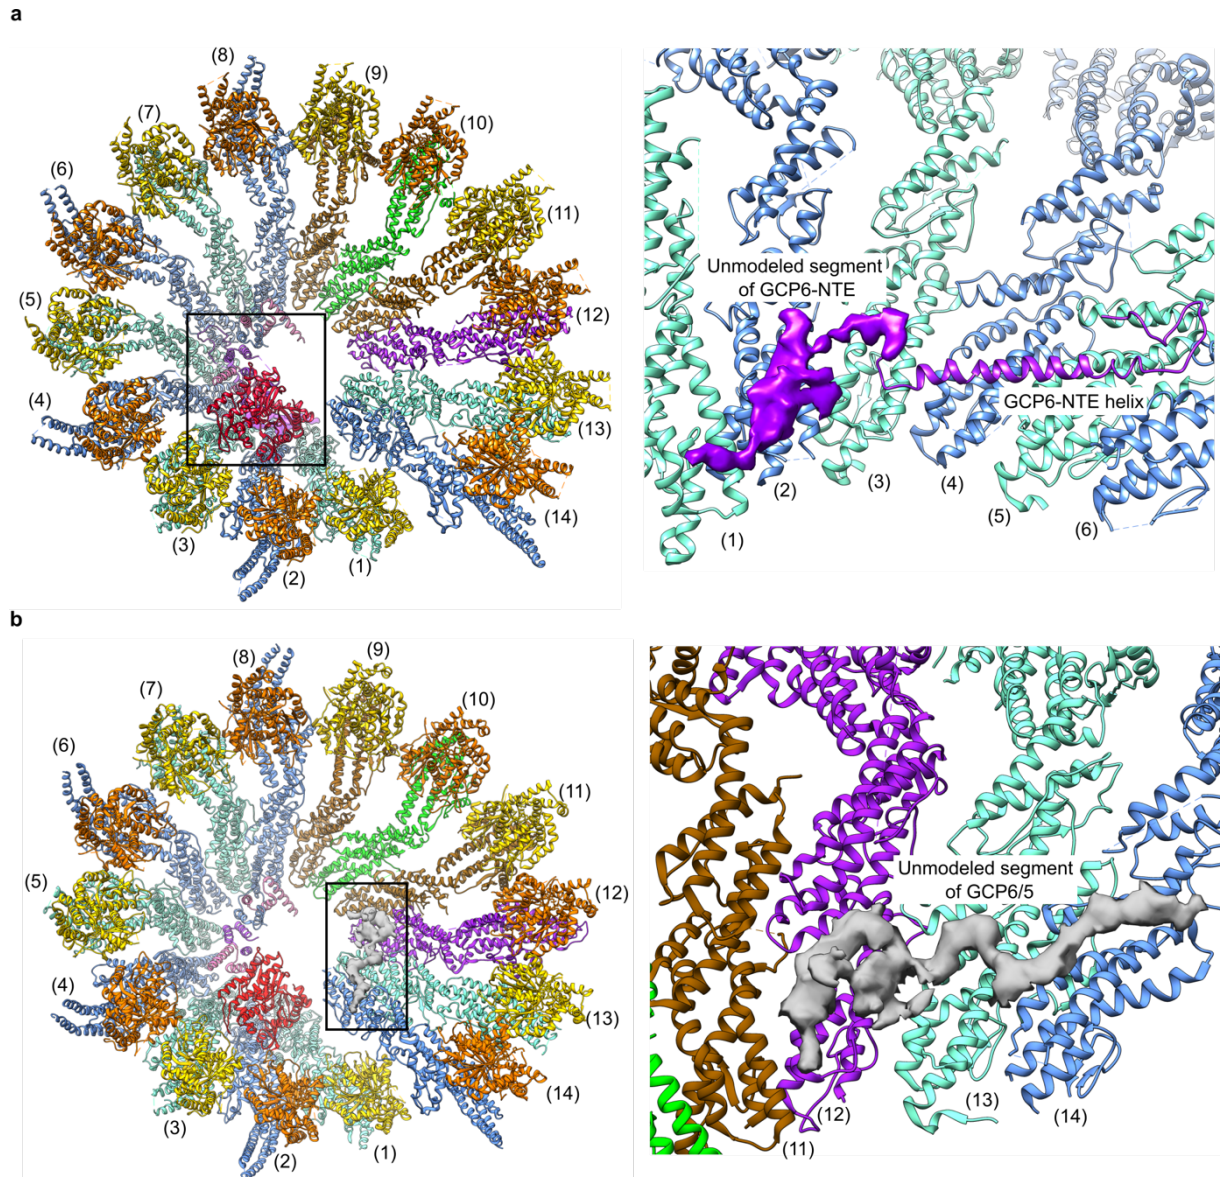

**Supplementary Fig. 10: The GCP6 GRIP1-NTE interacts with most  $\gamma$ -TuSC units.** **a** The GCP6 GRIP1-NTE (purple), as represented by a long helix (PBD 6X0U) and the continuous unmodeled density segment (EMD-21074), bridges and stabilizes all  $\gamma$ -TuSC units on the GCP4<sub>(9)</sub>-facing side of the complex. Coloring as in Fig. 1a. **b** An unidentified density segment (grey, EMD-11888) likely corresponding either to unmodeled parts of GCP5 or GCP6 binds to and stabilizes the  $\gamma$ -TuSC<sub>(13-14)</sub> unit. Coloring as in Fig. 1a.



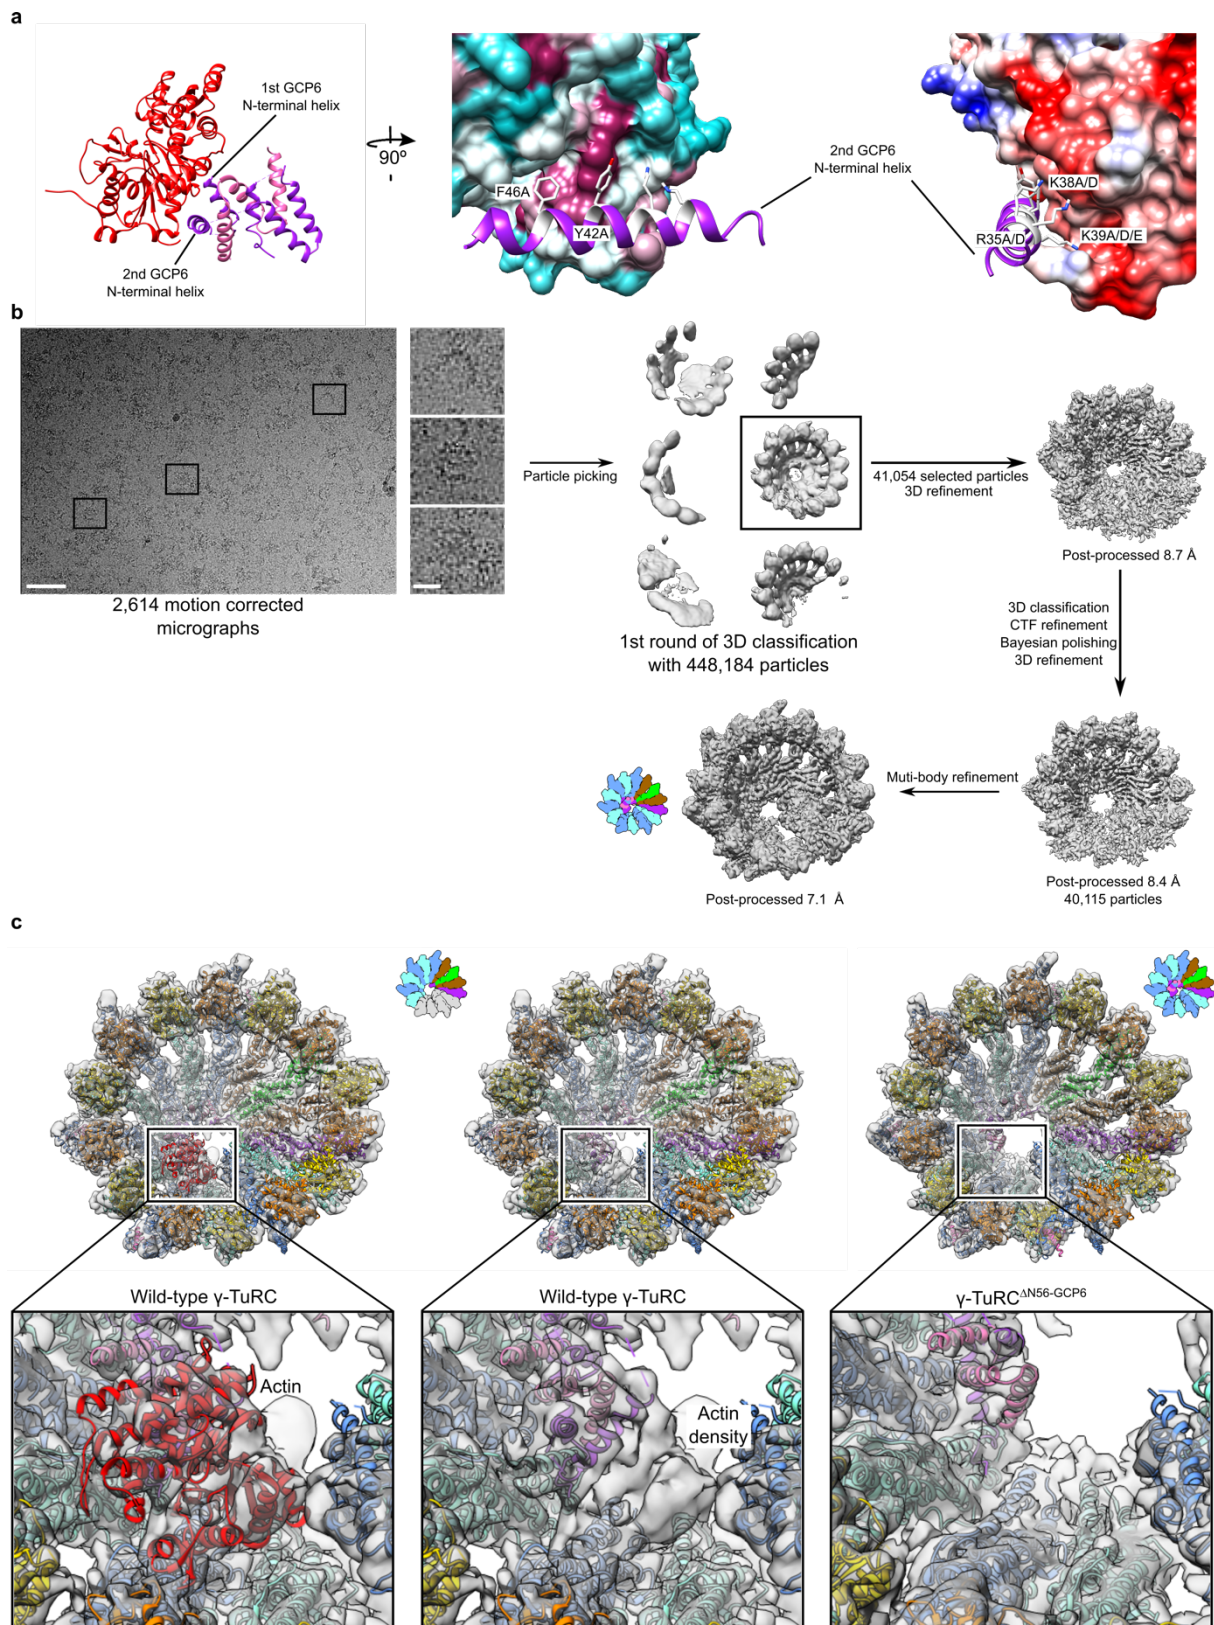

**Supplementary Fig. 11: Cryo-EM processing scheme and cryo-EM reconstruction of  $\gamma$ -TuRC<sup>AN56-GPC6</sup>.** **a** Left: Overview of the interface between the GPC6 GRIP1-NTE and actin. Interacting helices of the GPC6 GRIP1-NTE are indicated. Middle: Actin surface colored according to hydrophobicity (cyan: hydrophilic, white: neutral, maroon: hydrophobic). Residues of the second N-terminal GPC6 helix interacting with actin are shown in full atomic representation and colored white. Mutations of two hydrophobic residues are indicated. Right: Actin surface colored according to coulombic potential (blue: positive charge, white: neutral, red: negative charge). Mutations of three

positively charged residues are indicated. **b** Cryo-EM data processing scheme of  $\gamma$ -TuRC <sup>$\Delta$ N56-GCP6</sup>. Zoom on a representative micrograph and three representative particles. Scale bars correspond to 80 nm (micrograph) and 20 nm (particles), respectively. Two consecutive rounds of 3D classification separated fully assembled  $\gamma$ -TuRC <sup>$\Delta$ N56-GCP6</sup> from false positive particles and  $\gamma$ -TuRC <sup>$\Delta$ N56-GCP6</sup> subcomplexes. Number of particles and selected classes are indicated. Selected particles from the second round of 3D classification were subjected to CTF refinement, Bayesian polishing, 3D autorefinement and multi-body refinement. Global resolution of the 3D reconstruction and particle number are indicated. **c** Comparison of cryo-EM densities obtained for recombinant wild-type  $\gamma$ -TuRC and recombinant  $\gamma$ -TuRC <sup>$\Delta$ N56-GCP6</sup>. In the zoomed views, density segments corresponding to the luminal bridge of the two reconstructions are compared. Data shown in **b** are from one acquisition with no repetition.

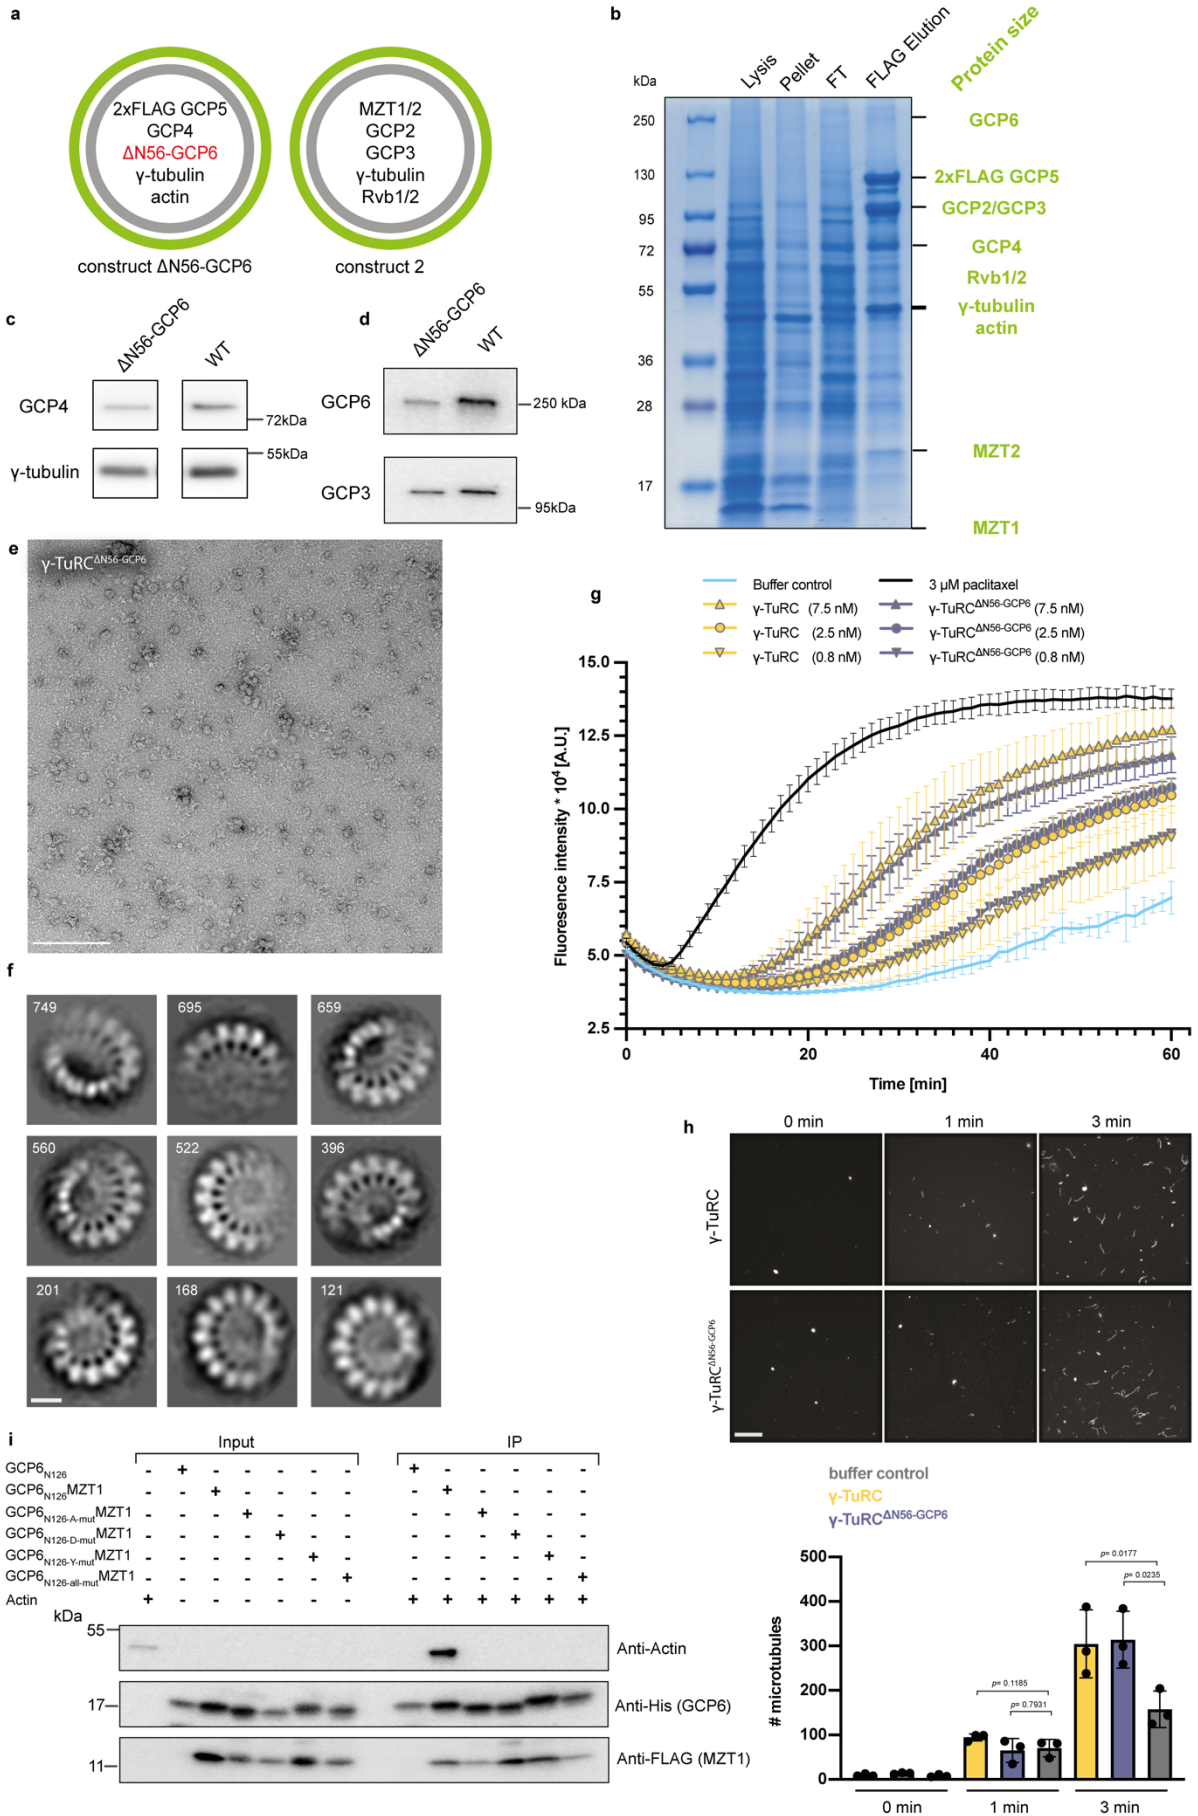

**Supplementary Fig. 12: Recombinant human  $\gamma$ -TuRC <sup>$\Delta$ N56-GCP6</sup>.** **A** Cloned MultiBac constructs (construct  $\Delta$ N56-GCP6 and construct 2) with the genes of human  $\gamma$ -TuRC with N-terminal deletion in GCP6 ( $\Delta$ N56 (red), see methods). Protein expression, purification and cryo-EM experiments were performed as described for wild-type (WT)  $\gamma$ -TuRC samples (Supplementary Fig. 1b). **b** Coomassie-stained SDS-PAGE of  $\gamma$ -TuRC <sup>$\Delta$ N56-GCP6</sup> purification used for cryo-EM showing the cell lysate (lysis), cell pellet (Pellet), flowthrough (FT), and several proteins copurified with 2xFLAG GCP5 in the FLAG elution. Expected protein sizes are indicated (green). **C,d** Section of immunoblot analysis of FLAG elution of WT  $\gamma$ -TuRC and  $\gamma$ -TuRC <sup>$\Delta$ N56-GCP6</sup>, against GCP4/ $\gamma$ -tubulin (**c**), and GCP6/GCP3 (**d**) antibodies, respectively. **e** Representative negative stain EM micrograph of recombinant human  $\gamma$ -TuRC <sup>$\Delta$ N56-GCP6</sup>, scale bar 250 nm. **f** Representative negative stain EM 2D class averages of the  $\gamma$ -TuRC <sup>$\Delta$ N56-GCP6</sup> sample. Particle numbers are given in the left upper corner of the images. Scale bar: 10 nm. **g** Batch *in vitro* microtubule nucleation assay comparing recombinant WT  $\gamma$ -TuRC and  $\gamma$ -TuRC <sup>$\Delta$ N56-GCP6</sup>. Shown are error bars for the standard deviation of the mean of (n=4) replicates for buffer control (blue), 3  $\mu$ M Paclitaxel as positive control (black), and three different concentrations of  $\gamma$ -TuRC (yellow) and  $\gamma$ -TuRC <sup>$\Delta$ N56-GCP6</sup> (purple) samples. Concentrations given in the figure correspond to the  $\gamma$ -tubulin concentration of the sample determined by immunoblot analysis in comparison to recombinant human  $\gamma$ -tubulin. **h** *In vitro* microtubule nucleation assay based on the quantification of individual microtubules. Coloring as indicated. Microtubules were nucleated either with recombinant WT  $\gamma$ -TuRC or  $\gamma$ -TuRC <sup>$\Delta$ N56-GCP6</sup> at 7 nM  $\gamma$ -tubulin concentration (see Supplementary Fig.12g and methods), or buffer control at a  $\alpha$ -tubulin concentration of 20  $\mu$ M containing 5% Cy3-labelled tubulin for visualization. Upper panel: representative light microscopy images of the three timepoints (0 min, 1 min and 3 min) of the recombinant WT  $\gamma$ -TuRC and  $\gamma$ -TuRC <sup>$\Delta$ N56-GCP6</sup> samples, scale bar 20  $\mu$ m. Lower panel: quantification of the microtubule numbers as mean $\pm$ s.d (bars) and the individual counts (dots) for each replicate of a given condition (n=3 replicates). Coloring as indicated and statistics were derived from two-tail unpaired t-test. **i** Immunoblot analysis of the actin IP experiment against His-tagged N-terminal fragments of GCP6 (GCP6<sub>N126</sub>-His<sub>8</sub>), co-expressed with *Flag-MZT1* in *E.coli*. Samples were GCP6<sub>N126</sub> without co-expression of *Flag-MZT1*, GCP6<sub>N126</sub>MZT1 and constructs with point mutations predicted to interfere with actin interaction: GCP6<sub>N126</sub>-A-mutMZT1 (R35A, K38A, K39A); GCP6<sub>N126</sub>-D-mutMZT1 (R35D, K38D, K39D); GCP6<sub>N126</sub>-Y-mutMZT1 (Y42A, F46A); GCP6<sub>N126</sub>-all-mutMZT1 (R35D, K38D, K39D, Y42A, F46A). Inputs and IP samples were probed against anti-actin, anti-His (GCP6) and anti-FLAG (MZT1) antibodies. In contrast to GCP6<sub>N126</sub>MZT1, mutated constructs do not pull down actin. Shown are sections of representative immunoblots of one experiment, IP experiments were performed in (n=3) independent experiments. Data shown in **b-f** are from one experiment with no repetition of SDS-page and negative stain EM imaging and one repetition of immunoblot analysis. Protein complex expression and purification were repeated more than n=3 times. Source data are provided as a Source Data file.

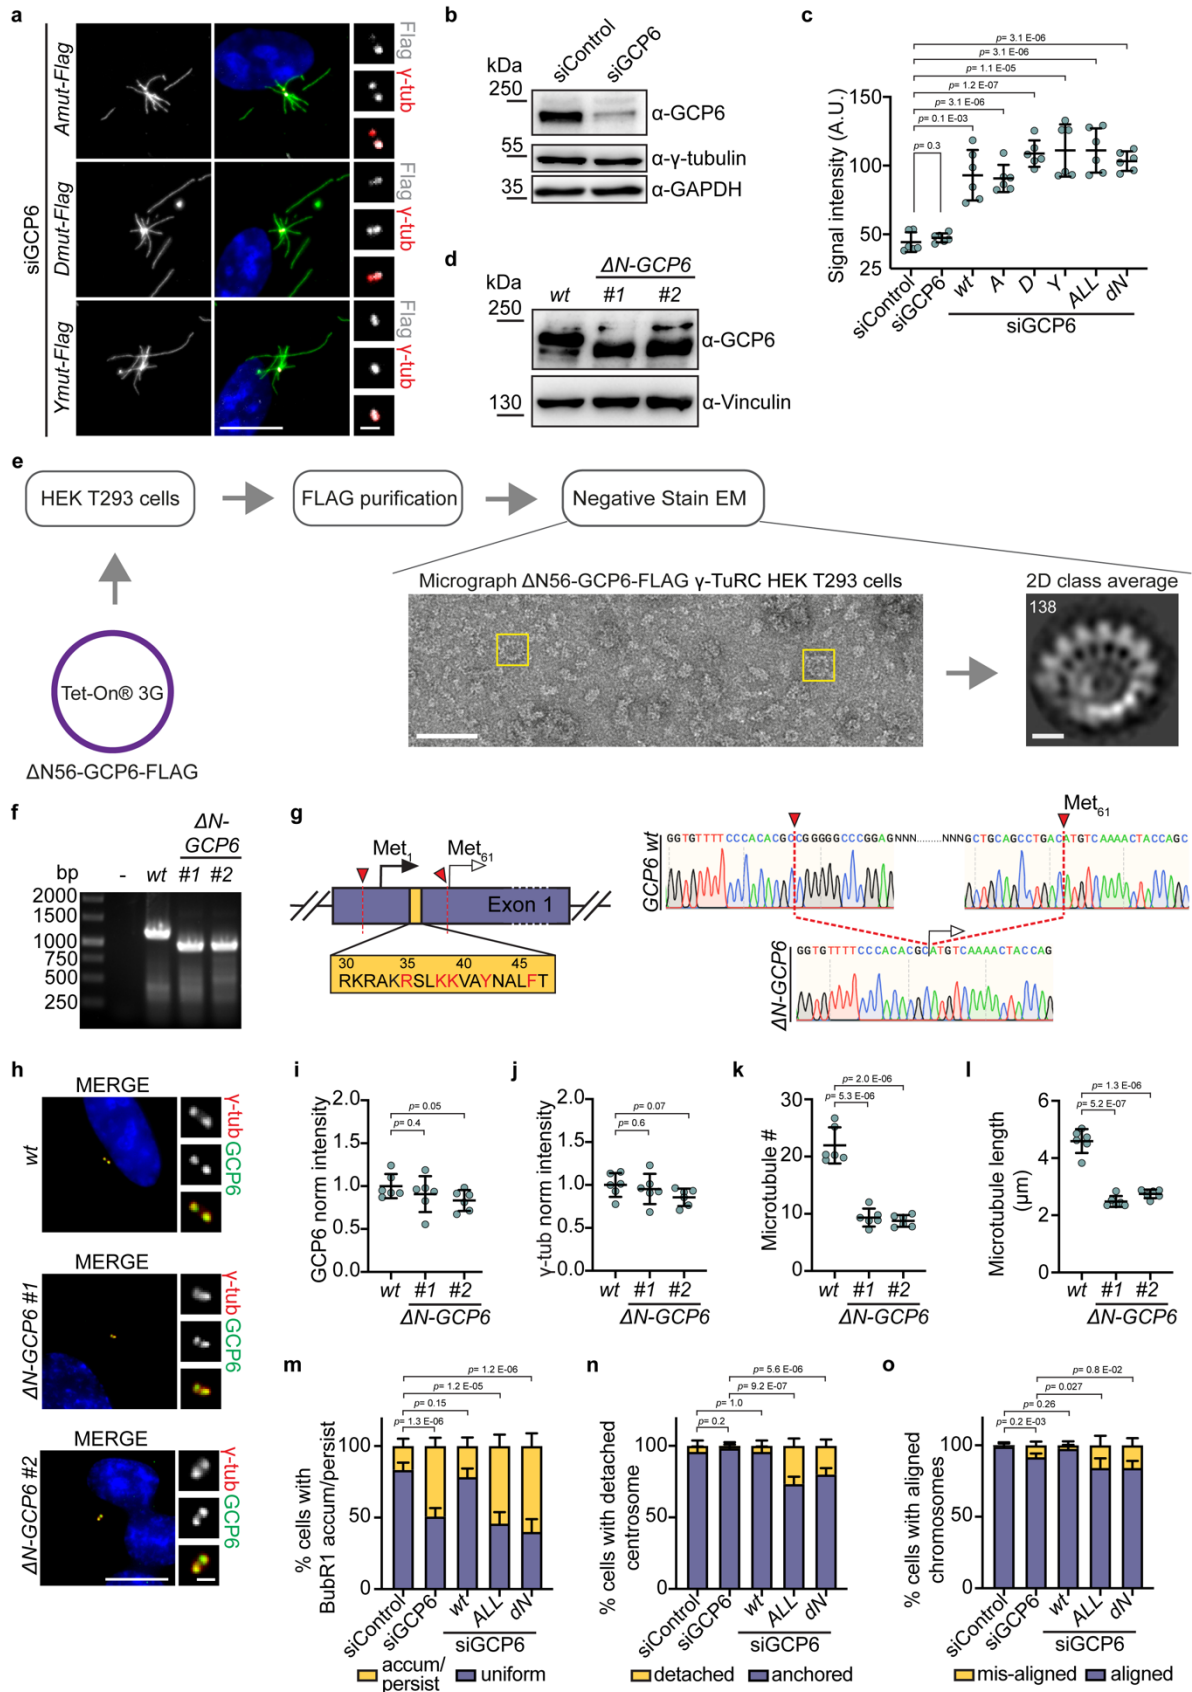

**Supplementary Fig. 13:  $\Delta N$ -GCP6 cells show MT nucleation defects and mitotic progression similarly to mutant constructs.** **a** IF of MT asters nucleated from the centrosome ( $\gamma$ -tubulin) in cells treated with siRNA and in which *TUBGCP6-C-terminal-FLAG* mutant constructs (*Amut* (R35A, K38A, K39A), *Dmut* (R35D, K38D, K39E) and *Ymut* (Y42A, F46A) were expressed (Flag), coloring as indicated (see Fig. 5a). **b** Immunoblot analysis of siGCP6

depletion efficiency. GCP6 depletion does not affect  $\gamma$ -tubulin levels in RPE1 cells. **c** FLAG signal intensity at the centrosome in the cells expressing *TUBGCP6-C-terminal-FLAG* wild-type (WT) and mutant constructs (*A* (R35A, K38A, K39A); *D* (R35D, K38D, K39E); *Y* (Y42A, F46A); *ALL* (R35D, K38D, K39E, Y42A, F46A); *dN* ( $\Delta$ N56-GCP6)) quantified in IF samples of (**a**; see Fig. 5a). **d** Section of immunoblot of the endogenous GCP6 levels in WT and  $\Delta$ N-GCP6 (deletion of first 60 AA). Note the downshift of the GCP6 bands in the samples of the two  $\Delta$ N-GCP6 clones. **e** Negative stain EM analysis of  $\Delta$ N56-GCP6-FLAG  $\gamma$ -TuRC purified from HEK T293 cells. Individual particles (yellow boxes) on micrographs (scale bar 100 nm) and a 2D class average (scale bar 10 nm) demonstrate that  $\gamma$ -TuRCs are structurally intact. **f** Genomic PCR of the *TUBGCP6* exon 1 locus targeted by the sgRNAs to generate the  $\Delta$ N-GCP6 clones. The genomic PCR product in the  $\Delta$ N-GCP6 clones reflect the calculated loss of 205 nt. **g** Left: scheme of the  $\Delta$ N-GCP6 cell line generation. The red arrowheads point the sgRNA target sites in Exon 1 (purple) with the actin interacting region (yellow). The black arrow represents the endogenous start codon Met<sub>1</sub>, while the white one the resulting start codon (Met<sub>61</sub>) in  $\Delta$ N-GCP6. Right: the sequenced genomic region of the WT and  $\Delta$ N-GCP6 cells, coloring as indicated. **h-j**  $\Delta$ N-GCP6 clones do not show a significant decrease of both  $\gamma$ -tubulin and GCP6 endogenous levels. **i** Quantification of the GCP6 signal intensity in IF (**h**). **j** Quantification of the  $\gamma$ -tubulin signal intensity in IF (**h**). Coloring as indicated. **k,l** *In vivo* MT regrowth assay in WT and  $\Delta$ N-GCP6 RPE1 cells. Average number (**k**) and average size (**l**) of microtubules nucleated from the centrosome in WT and  $\Delta$ N-GCP6 RPE1 cells. **m** Quantification of metaphase cells (%) in which BubR1 accumulated/persisted on centromeres non-uniformly in cells treated with siGCP6 and in which WT and *TUBGCP6* mutant constructs were expressed. **n** Quantification of metaphase cells (%) in which centrosomes detached from the spindle pole in cells treated with siGCP6 and in which WT and *TUBGCP6* mutant constructs were expressed. **o** Quantification of metaphase cells (%) in which chromosomes were aligned or close to alignment in the metaphase plate in cells treated with siGCP6 and in which WT and *TUBGCP6* mutant constructs were expressed. **m-o** Coloring as indicated and naming of mutants as in (**c**), (**a** and **h** scale bars: 10  $\mu$ m; magnification scale bar: 1  $\mu$ m; **c**, **i-o** data are presented as mean $\pm$ s.d., all statistics were derived from two-tail unpaired t-test analysis of: 3 replicates of 2 independent experiment (n=6)). Immunoblots shown in **b,c** and agarose gel in **f** are representative of n=2 experiments, negative stain EM data shown in **e** are from one experiment with no repetition. Source data are provided as a Source Data file.

**Supplementary Table 1: Cryo-EM data collection and refinement statistics**

| Data collection and processing                      |                                                                                                              |                                     |                                   |
|-----------------------------------------------------|--------------------------------------------------------------------------------------------------------------|-------------------------------------|-----------------------------------|
| Sample                                              | $\gamma$ -TuRC WT                                                                                            | $\gamma$ -TuRC <sup>AN56-GCP6</sup> | $\gamma$ -TuRC <sup>AGCP2/3</sup> |
| EMDB ID                                             | 14005, 14006, 14007, 14008, 14009, 14010, 14011, 14012, 14013, 14014, 14015, 14016, 14017                    | 14018                               | 14019                             |
| PDB ID                                              | 7QJ0, 7QJ1, 7QJ2, 7QJ3, 7QJ4, 7QJ5, 7QJ6, 7QJ7, 7QJ8, 7QJ9, 7QJA, 7QJB, 7QJC                                 | 7QJD                                | 7QJE                              |
| Microscope                                          | Titan Krios G1                                                                                               | Titan Krios G1                      | Titan Krios G1                    |
| Detector                                            | Gatan K3 camera                                                                                              | Gatan K3 camera                     | Gatan K3 camera                   |
| Magnification                                       | 33,000                                                                                                       | 33,000                              | 81,000                            |
| Voltage (kV)                                        | 300                                                                                                          | 300                                 | 300                               |
| Electron exposure (e <sup>-</sup> /Å <sup>2</sup> ) | 35                                                                                                           | 42.6                                | 62.4                              |
| Defocus range (μm)                                  | -2 to -2.5                                                                                                   | -2 to -2.5                          | -1 to -3                          |
| Pixel size (Å/px)                                   | 2.66                                                                                                         | 2.66                                | 1.07                              |
| Symmetry imposed                                    | C1                                                                                                           | C1                                  | C1                                |
| Number of movies                                    | 6,127                                                                                                        | 2,614                               | 11,276                            |
| Initial particle images                             | 436,887                                                                                                      | 448,184                             | 1,888,166                         |
| Final particle images                               | 92,149; 59,861; 10,965; 17,337; 6,097; 36,881; 28,611; 8,270; 5,443; 21,860; 5,376; 6,456; 2,645             | 40,115                              | 9,192                             |
| Map resolution (Å)                                  | 5.3, 7.0, 8.6, 7.6, 9.0, 8.7, 7.8, 8.7, 8.7, 8.1, 9.2, 9.0, 16.1                                             | 7.1                                 | 7.8                               |
| FSC threshold                                       | 0.143                                                                                                        | 0.143                               | 0.143                             |
| Map-sharpening factor (Å <sup>2</sup> )             | B -248.2, -475.1, -410.5, -366.7, -544.1, -434.4, -378.7, -249.2, -201.6, -553.1, -300.0, -300.0, -45.47     | -282.3                              | -687.1                            |
| Model building and refinement                       |                                                                                                              |                                     |                                   |
| Model composition                                   |                                                                                                              |                                     |                                   |
| Protein atoms                                       | 51,018; 50,991; 69,211; 69,169; 87,398; 126,797; 91,728; 109,757; 108,530; 91,688; 109,749; 108,550; 125,300 | 124,856                             | 31,375                            |
| Nucleic acid atoms                                  | 0, 0, 0, 0, 0, 0, 0, 0, 0, 0, 0, 0, 0                                                                        | 0                                   | 0                                 |
| Ligands                                             | 0, 0, 0, 0, 0, 0, 0, 0, 0, 0, 0, 0, 0                                                                        | 0                                   | 0                                 |
| RMSDs from ideal                                    |                                                                                                              |                                     |                                   |
| Bond lengths (Å)                                    | 0.007, 0.006, 0.007, 0.007, 0.008, 0.007, 0.007, 0.006, 0.006, 0.007, 0.006, 0.006, 0.006                    | 0.007                               | 0.006                             |
| Bond angles (°)                                     | 1.149, 1.310, 1.271, 1.370, 1.269, 1.318, 1.229, 1.163, 1.152, 1.290, 1.171, 1.170, 1.179                    | 1.177                               | 1.276                             |
| Validation                                          |                                                                                                              |                                     |                                   |
| Clashscore                                          | 4.59, 4.88, 5.29, 5.96, 6.44, 6.60, 5.52, 5.71, 4.97, 6.65, 4.41, 4.81, 6.26                                 | 5.51                                | 5.00                              |

|                      |                                                                                              |       |       |
|----------------------|----------------------------------------------------------------------------------------------|-------|-------|
| Rotamer outliers (%) | 4.71, 8.34, 6.37, 10.49, 6.35, 6.21, 5.38,<br>4.65, 3.42, 5.62, 4.12, 3.75, 4.47             | 3.15  | 0.55  |
| Ramachandran plot    |                                                                                              |       |       |
| Favored (%)          | 95.25, 95.79, 95.30, 95.70, 95.01, 94.61, 94.23,<br>94.95, 94.46, 94.79, 94.90, 94.58, 95.07 | 95.34 | 92.91 |
| Allowed (%)          | 4.44, 3.95, 4.52, 3.91, 4.50, 5.08, 5.30,<br>4.81, 5.11, 4.94, 4.86, 5.26, 4.54              | 4.41  | 6.23  |
| Outlier (%)          | 0.31, 0.26, 0.18, 0.39, 0.49, 0.31, 0.47,<br>0.24, 0.43, 0.26, 0.23, 0.16, 0.39              | 0.25  | 0.86  |

---



**Supplementary Table 2: Primer list.**

| Name                       | Sequence (5' → 3')                                                                                                             | Source                          | Identifier |
|----------------------------|--------------------------------------------------------------------------------------------------------------------------------|---------------------------------|------------|
| MZT2_fwd                   | AAAACCTATAAATATATGGCGGCGCAGGGCGTA                                                                                              | This study                      | N/A        |
| MZT2_rev                   | ACTGCAGGCTCTAGACTAGGTGCTGCCCCGTGTAG                                                                                            | This study                      | N/A        |
| GCP3_fwd                   | AAAACCTATAAATATGGCGACCCCGACCAGAAG                                                                                              | Würtz et al., 2021 <sup>3</sup> | N/A        |
| GCP3-TEV-<br>2xFLAG_rev    | GATTACTTATCGTCGTCATCCTTGTAATCCTTGTCG<br>TCATCGTCCTTGAGTCTCCGCTCCTCCGCCGCC<br>CTGAAAATACAGGTTTTTCGGATGCCGTGTGGGAGC<br>TGCGCCGCC | This study                      | N/A        |
| ΔN56-GCP6_fwd              | CATATTTATAGGTTTTTTTATTACAAAACCTGTTACGA                                                                                         | This study                      | N/A        |
| ΔN56-GCP6_rev              | TCTAGAGCCTGCAGTCTCG                                                                                                            | This study                      | N/A        |
| MultiBac_vector_fw<br>d    | TCTAGAGCCTGCAGTCTCG                                                                                                            | Würtz et al., 2021              | N/A        |
| MultiBac_vector_re<br>v    | CAGTTTTGTAATAAAAAAACCTATAAATAT                                                                                                 | Würtz et al., 2021              | N/A        |
| Combination_vector<br>_fwd | TTCGCGACCTACTCCGGA                                                                                                             | Würtz et al., 2021              | N/A        |
| Combination_vector<br>_rev | CAGATAACTTCGTATAATGTATGCT                                                                                                      | Würtz et al., 2021              | N/A        |
| Combination_insert<br>_fwd | ATACGAAGTTATCTGTTTCGCGACCTACTCCGGA                                                                                             | Würtz et al., 2021              | N/A        |
| Combination_insert<br>_rev | GGAGTAGGTCGCGAAGATCCAGACATGATAAGATA<br>CATTG                                                                                   | Würtz et al., 2021              | N/A        |
| FLAG-MZT1 fwd              | ACTTTAAGAAGGAGATATACCATGGATGGACTACAA<br>AGACGATGACGACAAGGGTTCTATGGCGAGTAGCG<br>GCGGT                                           | This study                      | N/A        |
| FLAG-MZT1 rev              | CTGCAGGCGCGCCGAGCTCGAATTCTCAGCTTGTC<br>ATATTTTCAGCAGCCTTC                                                                      | This study                      | N/A        |
| GCP6N126 fwd               | GTATAAGAAGGAGATATACATATGGCCAGCATCAC<br>GCAGCTG                                                                                 | This study                      | N/A        |
| GCP6N126 rev               | CAGCGGTTTCTTTACCAGACTCGAGTTAATGATGAT<br>GGTGGTGGTGGTGGTGGGATCCCAGAACTTGA<br>GGGACCAC                                           | This study                      | N/A        |
| GCP6(pET26b)_fwd           | CTTTAAGAAGGAGATATACATATGGCCAGCATCAC<br>GCAGCTG                                                                                 | This study                      | N/A        |
| GCP6(pET26b)_rev           | GGTGGTGGTGGTGGTGGTGGGATCCCAGAACTTGA<br>GGGGGACCAC                                                                              | This study                      | N/A        |
| 42A 46A fwd                | GTGGCCGCTAATGCTCTTGCGACAAATCTTTTTCAA<br>GATGAGACTCAAC                                                                          | This study                      | N/A        |
| 42A 46A rev                | GCATTAGCGGCCACCTTCTTGAGGCT                                                                                                     | This study                      | N/A        |
| 35D 38D 39D fwd            | AGGGCAAAGGATAGCCTCGACGACGTGGCCTACA<br>ATGCTCTTTTC                                                                              | This study                      | N/A        |
| 35D 38D 39D rev            | AGGCTATCCTTTGCCCTCTTCCGGTT                                                                                                     | This study                      | N/A        |
| 35D 38D 39D for all<br>mut | AGGGCAAAGGATAGCCTCGACGACGTGGCCGCTA<br>ATGCTCTTGCGACA                                                                           | This study                      | N/A        |

|                                                      |                                                           |            |     |
|------------------------------------------------------|-----------------------------------------------------------|------------|-----|
| 35A 38A 39A for all fwd                              | GCAAAGGCGAGCCTCGCTGCCGTGGCCGCTAATGCT                      | This study | N/A |
| 35A 38A 39A for all rev                              | AGCATTAGCGGCCACGGCAGCGAGGCTCGCCTTTGC                      | This study | N/A |
| 35A 38A 39A fwd                                      | GAAGAGGGCAAAGGCGAGCCTCGCGGCGGTGGCCTACAATGCTCTTTTC         | This study | N/A |
| 35A 38A 39A rev                                      | AGGCTCGCCTTTGCCCTCTTCCGGTT                                | This study | N/A |
| ΔN56-GCP6 (pETDUET) fwd                              | GAAGGAGATATACATATGCTGCAGCCTGACATGCTAAA                    | This study | N/A |
| ΔN56-GCP6 (pETDUET) rev                              | ATGTATATCTCCTTCTTATACTTAACTAATATACTAAGATGG                | This study | N/A |
| pRetroX-TRE3G-hGCP6siRES-linkerFlag fw               | CAACACTTTTTGTCTTATACTTGGATCCATCGATAGCCACCATGGCCAGCATCACGC | This study | N/A |
| pRetroX-TRE3G-hGCP6-linkerFlag siRES mut rv          | GTAATTGCTGGGTTTTCGTCTTGAAAAAGATTTGTGAAAGAGCATTGTAGG       | This study | N/A |
| pRetroX-TRE3G-hGCP6-linkerFlag siRES mut fw          | CAAATCTTTTTCAAGAcGAaACcCAgCAatTaCAGCCTGACATGTCAAACCTACC   | This study | N/A |
| pRetroX-TRE3G-hGCP6siRES-linkerFlag rv               | CTGCACCTGCACCAGCTCCTGCGGCGTCCTGGTAGTGGTA                  | This study | N/A |
| pRetroX-TRE3G-hGCP6-linkerFlag R35D K38D K39E mut rv | CTCGTCGAGGCTGTCCCTTTGCCCTCTTCCGGTTC                       | This study | N/A |
| pRetroX-TRE3G-hGCP6-linkerFlag R35D K38D K39E mut fw | GGACAGCCTCGACGAGGTGGCCTACAATGCTC                          | This study | N/A |
| pRetroX-TRE3G-hGCP6-linkerFlag R35A K38A K39A mut rv | AGCAGCGAGGCTGGCCTTTGCCCTCTTCCGGTTC                        | This study | N/A |
| pRetroX-TRE3G-hGCP6-linkerFlag R35A K38A K39A mut fw | GCCAGCCTCGCTGCTGTGGCCTACAATGCTCTTTTCCC                    | This study | N/A |
| pRetroX-TRE3G-hGCP6-linkerFlag Y42A F46A mut rv      | TGGCAAGAGCATTGGCGGCCACCTTCTTGAGGCTC                       | This study | N/A |
| pRetroX-TRE3G-hGCP6-linkerFlag Y42A F46A mut fw      | CGCCAATGCTCTTGCCACAAATCTTTTTCAAGACGA AACCAGCAATTAC        | This study | N/A |

|                                                                          |                                                                          |            |     |
|--------------------------------------------------------------------------|--------------------------------------------------------------------------|------------|-----|
| pRetroX-TRE3G-<br>hGCP6-linkerFlag<br>R35D K38D K39E<br>Y42A F46A mut rv | TGGCAAGAGCATTGGCGGCCACCTCGTCGAGG                                         | This study | N/A |
| pRetroX-TRE3G-<br>hGCP6-linkerFlag<br>R35D K38D K39E<br>Y42A F46A mut fw | CGCCAATGCTCTTGCCACAAATCTTTTTCAAGACGA<br>AACCCAGC                         | This study | N/A |
| pRetroX-TRE3G-<br>hGCP6siRES-<br>linkerFlag deltaN fw                    | CAACACTTTTGTCTTATACTTGGATCCATCGATAGC<br>CACCATGtTaCAGCCTGACATGTCAAAACTAC | This study | N/A |
| sgRNA hGCP6 cut1<br>fw                                                   | caccgGGTGTTCCTCCACACGCGG                                                 | This study | N/A |
| sgRNA hGCP6 cut1<br>rv                                                   | aaacCCGGCGTGTGGGAAAACACCc                                                | This study | N/A |
| sgRNA hGCP6 cut2<br>fw                                                   | caccgGCTGGTAGTTTTGACATGTC                                                | This study | N/A |
| sgRNA hGCP6 cut2<br>rv                                                   | aaacGACATGTCAAAACTACCAGCc                                                | This study | N/A |
| hGCP6 KO PCR fw                                                          | GTGGGCACTTTCCACGGGTGAG                                                   | This study | N/A |
| hGCP6 KO PCR rv                                                          | GAAGAGCGAGACCCGGGTGTCT                                                   | This study | N/A |

**Supplementary Table 3: Antibodies.**

| Antibody                                       | Source                           | Identifier |
|------------------------------------------------|----------------------------------|------------|
| Rabbit anti-GAPDH                              | CellSignalling                   | 14C10      |
| Mouse anti-Vinculin                            | Proteintech                      | 66305-1-Ig |
| Mouse monoclonal anti- $\beta$ -Actin (human)  | Proteintech                      | 66009-1-Ig |
| Mouse anti- $\gamma$ -tubulin                  | Abcam                            | Ab27074    |
| Guinea pig anti- $\gamma$ -tubulin             | Atorino et al. 2020 <sup>4</sup> | N/A        |
| Rabbit anti-TUBGCP3                            | Proteintech                      | 15719-1-AP |
| Rabbit anti-FL-GCP4                            | Liu et al. 2019 <sup>5</sup>     | N/A        |
| Rabbit polyclonal anti-GCP6                    | Bethyl                           | A302-662A  |
| Mouse monoclonal HRP conjugated anti-penta-His | Proteintech                      | HRP-66005  |
| Mouse anti-penta-His                           | QIAGEN                           | 34660      |
| Rabbit Polyclonal DDDDK tag (FLAG)             | Proteintech                      | 20543-1-AP |
| Mouse anti-FLAG                                | Cell signaling                   | 9A3        |
| Rabbit anti- $\alpha$ -tubulin                 | MBL                              | PM054      |
| Mouse anti- $\alpha$ -tubulin                  | SigmaAldrich                     | DM1A       |
| Mouse anti-BubR1                               | Abcam                            | Ab4637     |
| Rabbit anti-Pericentrin                        | Abcam                            | Ab4448     |

## References

1. Thomas, W. & Kelley, C. Gnuplot 5.2: an interactive plotting program. (2019).
2. Wieczorek, M. *et al.* Asymmetric Molecular Architecture of the Human  $\gamma$ -Tubulin Ring Complex. *Cell* **180**, 165-175.e16 (2020).
3. Würtz, M. *et al.* Reconstitution of the recombinant human  $\gamma$ -tubulin ring complex. *Open Biol.* **11**, 200325 (2021).
4. Atorino, E. S., Hata, S., Funaya, C., Neuner, A. & Schiebel, E. CEP44 ensures the formation of bona fide centriole wall, a requirement for the centriole-to-centrosome conversion. *Nat. Commun.* **11**, 903 (2020).
5. Liu, P. *et al.* Insights into the assembly and activation of the microtubule nucleator  $\gamma$ -TuRC. *Nature* (2019) doi:10.1038/s41586-019-1896-6.

Supplementary source data - Gels

Related to Supplementary Fig. S1c

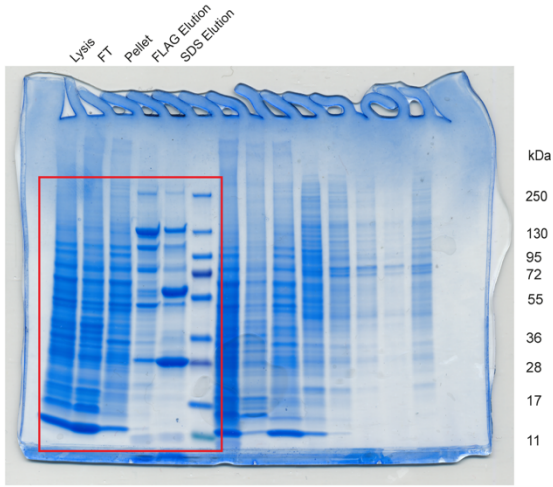

Related to Supplementary Fig. S6b

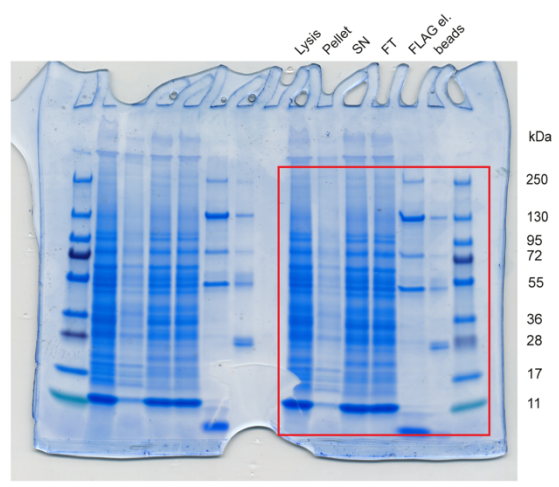

Related to Supplementary Fig. S8d

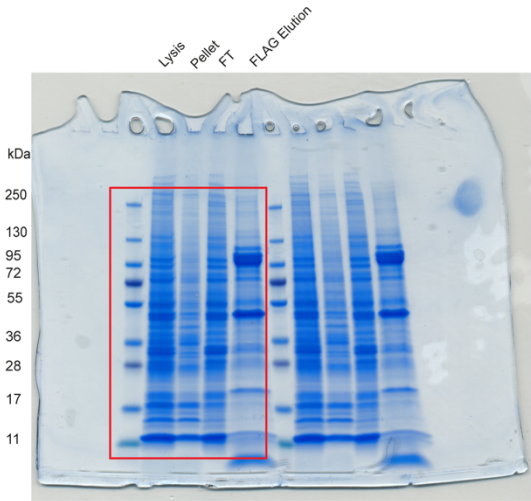

Related to Supplementary Fig. S8e

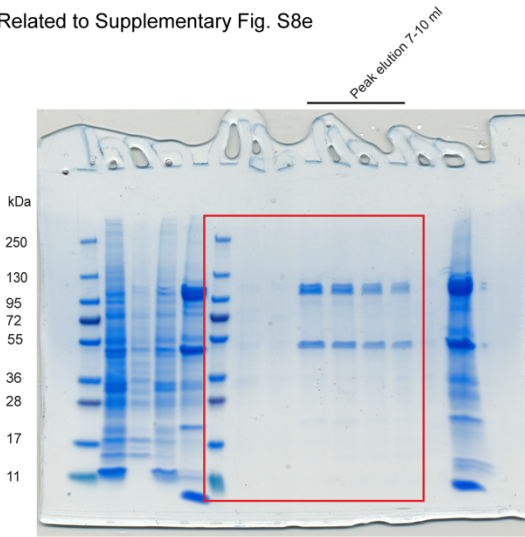

Related to Supplementary Fig. S12b

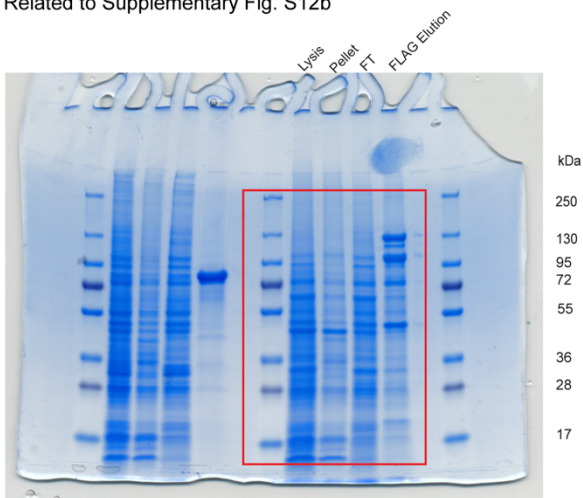

Related to Supplementary Fig. S6c

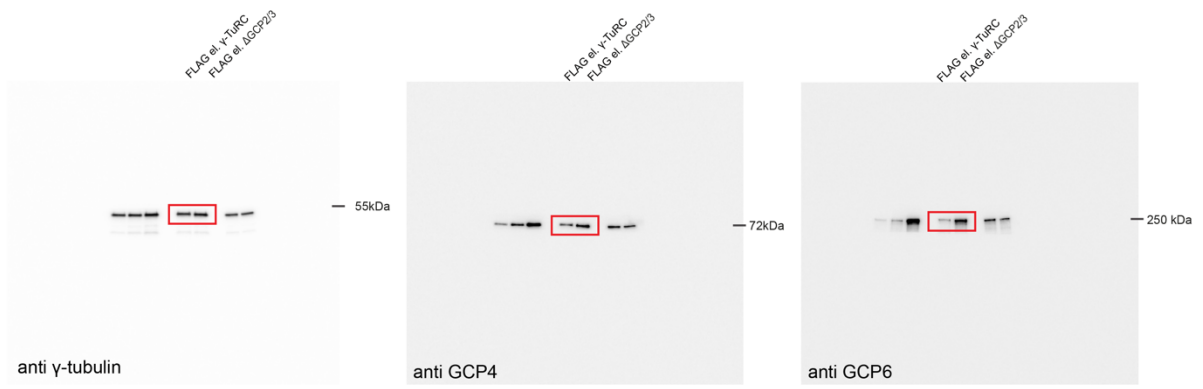

Related to Supplementary Fig. S12c

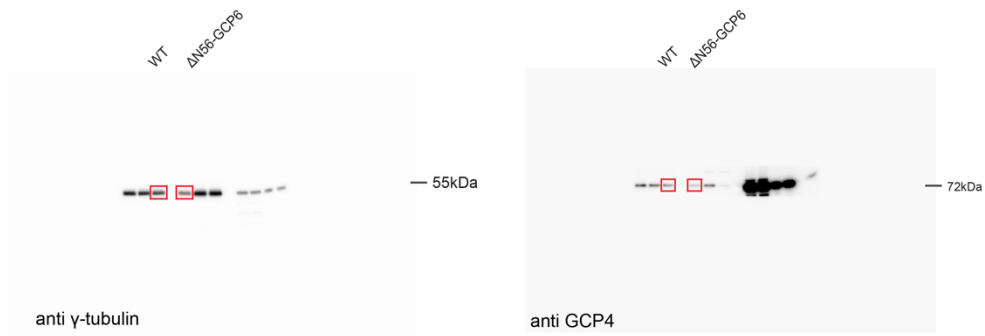

Related to Supplementary Fig. S12d

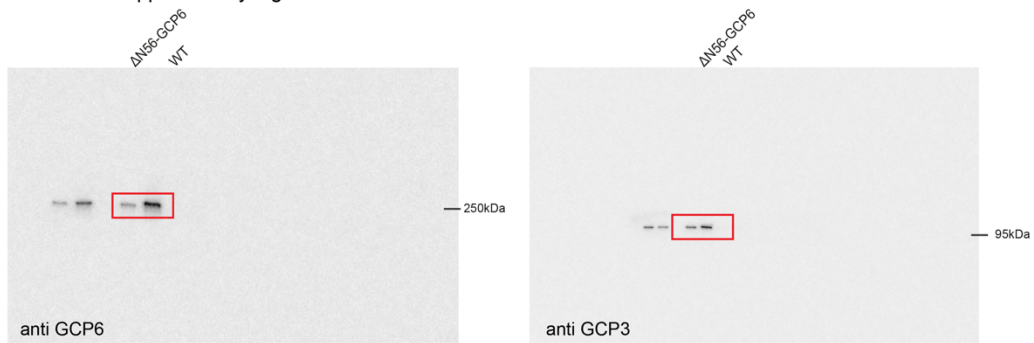

Related to Supplementary Fig. S12i

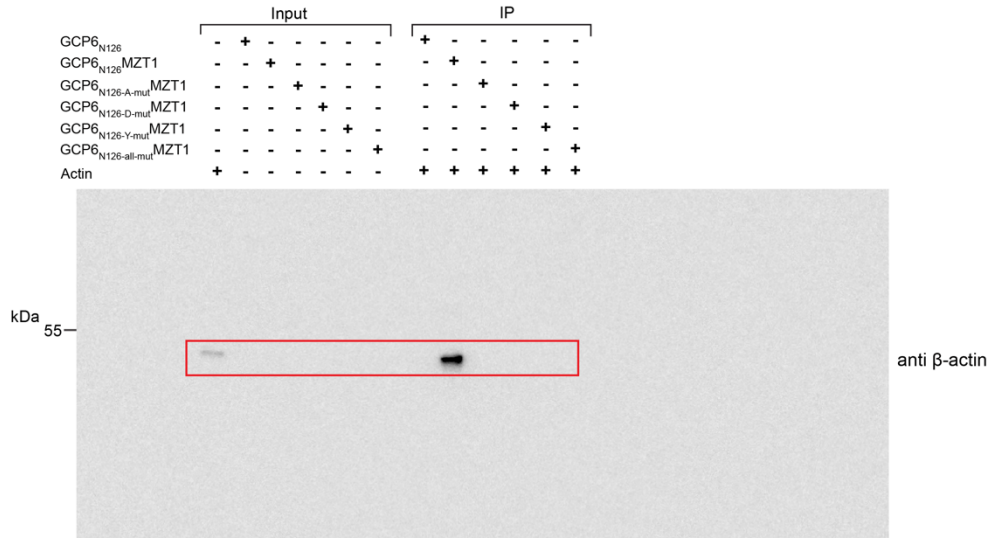

Related to Supplementary Fig. S12i

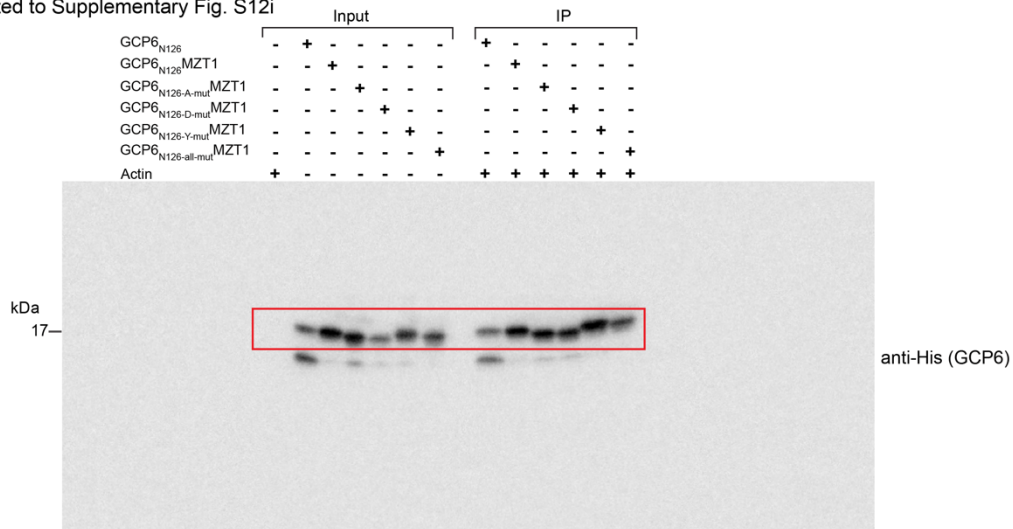

Related to Supplementary Fig. S12i

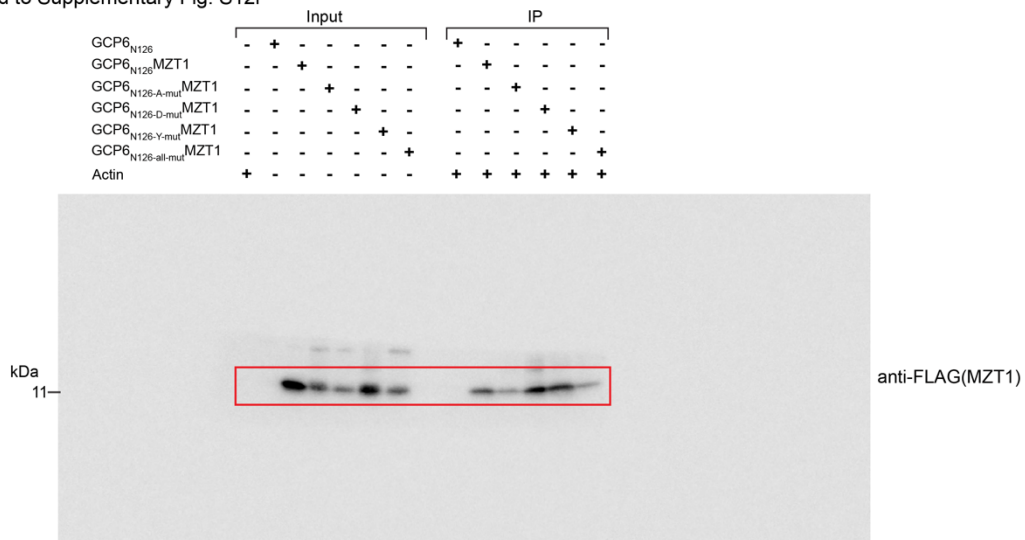



Related to Supplementary Fig. S13b

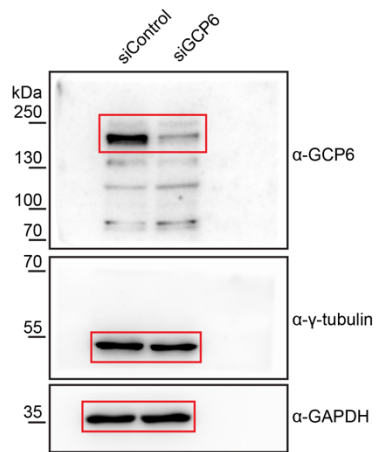

Related to Supplementary Fig. S13d

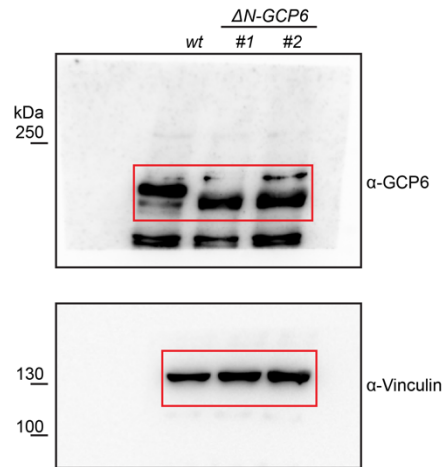

Related to Supplementary Fig. S13f

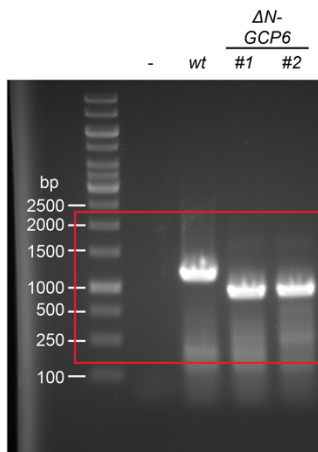

Supplement: 41467_2022_28079_MOESM1_ESM.pdf [file 41467_2022_28079_MOESM1_ESM.pdf]
