# Supplementary material for: Modular assembly of the principal microtubule nucleator γ-TuRC
Source: PubMed Central journal article supplement (PMC8789826; doi:10.1038/s41467-022-28079-0), 2022-01-25
Supplement: 41467_2022_28079_MOESM3_ESM.pdf [file 41467_2022_28079_MOESM3_ESM.pdf]

**Supplementary Movie 1:** Time-lapse imaging of RPE1 *TUBG1-mRuby2* (green pseudo-color) / *mNeonGreen-LMNB1* (red pseudo-color) cell undergoing mitosis. The imaged mitosis events show centrosome cohesion (green, -00:08 h:min) followed by centrosome separation (green, 00:00 h:min), nuclear envelope breakdown (red, 01:32 h:min) and nuclear envelope re-formation (red, 01:48 h:min). 4 min interval between frames.

**Supplementary Movie 2:** Time-lapse imaging of RPE1  $\Delta$ N-GCP6 clone #1, *TUBG1-mRuby2* (green pseudo-color) / *mNeonGreen-LMNB1* (red pseudo-color) cell undergoing mitosis. The imaged mitosis events show centrosome cohesion (green, -00:08 h:min) followed by centrosome separation (green, 00:00 h:min), nuclear envelope breakdown (red, 01:56 h:min) and nuclear envelope re-formation (red, 02:12 h:min). 4 min interval between frames.

**Supplementary Movie 3:** Time-lapse imaging of RPE1  $\Delta$ N-GCP6 clone #2, *TUBG1-mRuby2* (green pseudo-color) / *mNeonGreen-LMNB1* (red pseudo-color) cell undergoing mitosis. The imaged mitosis events show centrosome cohesion (green, -00:08 h:min) followed by centrosome separation (green, 00:00 h:min), nuclear envelope breakdown (red, 02:24 h:min) and nuclear envelope re-formation (red, 02:56 h:min). 4 min interval between frames.
